# Supplementary material for: Discovery of Guanidine Derivatives from Buthus martensii Karsch with Metal-Binding and Cholinesterase Inhibition Properties
Source: Molecules. 2021 Nov 8;26(21):6737. doi: 10.3390/molecules26216737 (PMC8588048; doi:10.3390/molecules26216737)
Supplement: Supplementary file 1 [file molecules-26-06737-s001.zip › molecules-1407418-supplementary.pdf]

# Supplementary material

## Discovery of guanidine derivatives from *Buthus martensii* Karsch with metal-binding and cholinesterase inhibition properties

Yu-Ming Liu <sup>1,2,\*</sup>, Jing-Jing Fan <sup>1</sup> and Li-Ning Wang <sup>3</sup>

<sup>1</sup> Department of Pharmacy Engineering, Tianjin University of Technology, Tianjin 300384, PR China

<sup>2</sup> Tianjin Key Laboratory of Drug Targeting and Bioimaging, Tianjin University of Technology, Tianjin 300384, PR China

<sup>3</sup> College of Traditional Chinese Medicine, Tianjin University of Traditional Chinese Medicine, Tianjin 300193, PR China

\* *Corresponding author.* Department of Pharmacy Engineering, Tianjin University of Technology, Tianjin, 300384, PR China.

E-mail address: coumarin1968@hotmail.com (Y.-M. Liu).

## Table of Contents

|                                                                                                                                                     |    |
|-----------------------------------------------------------------------------------------------------------------------------------------------------|----|
| <b>Figure S1.</b> HR-ESI-MS spectrum of martensine A (1)                                                                                            | 3  |
| <b>Figure S2.</b> HR-ESI-MS <sup>2</sup> spectrum ( $M' = 251.1514 [M+H]^+$ ) of martensine A (1)                                                   | 4  |
| <b>Figure S3.</b> <sup>1</sup> H NMR spectrum (CD <sub>3</sub> OD) of martensine A (1)                                                              | 5  |
| <b>Figure S4.</b> <sup>13</sup> C NMR spectrum (CD <sub>3</sub> OD) of martensine A (1)                                                             | 6  |
| <b>Figure S5.</b> DEPT 135 spectrum of martensine A (1)                                                                                             | 7  |
| <b>Figure S6.</b> <sup>1</sup> H- <sup>1</sup> H COSY spectrum of martensine A (1)                                                                  | 8  |
| <b>Figure S7.</b> HSQC spectrum of martensine A (1)                                                                                                 | 9  |
| <b>Figure S8.</b> HMBC spectrum of martensine A (1)                                                                                                 | 10 |
| <b>Figure S9.</b> NOESY spectrum of martensine A (1)                                                                                                | 11 |
| <b>Figure S10.</b> HR-ESI-MS spectrum of martensine B (2)                                                                                           | 12 |
| <b>Figure S11.</b> <sup>1</sup> H NMR spectrum (CD <sub>3</sub> OD) of martensine B (2)                                                             | 13 |
| <b>Figure S12.</b> <sup>13</sup> C NMR spectrum (CD <sub>3</sub> OD) of martensine B (2)                                                            | 14 |
| <b>Figure S13.</b> DEPT 135 spectrum of martensine B (2)                                                                                            | 15 |
| <b>Figure S14.</b> <sup>1</sup> H- <sup>1</sup> H COSY spectrum of martensine B (2)                                                                 | 16 |
| <b>Figure S15.</b> HSQC spectrum of martensine B (2)                                                                                                | 17 |
| <b>Figure S16.</b> HMBC spectrum of martensine B (2)                                                                                                | 18 |
| <b>Figure S17.</b> NOESY spectrum of martensine B (2)                                                                                               | 19 |
| <b>Figure S18.</b> HR-ESI-MS spectrum of trigonelline (3)                                                                                           | 20 |
| <b>Figure S19.</b> <sup>1</sup> H NMR spectrum (CD <sub>3</sub> OD) of trigonelline (3)                                                             | 21 |
| <b>Figure S20.</b> <sup>13</sup> C NMR spectrum (CD <sub>3</sub> OD) of trigonelline (3)                                                            | 22 |
| <b>Figure S21.</b> <sup>1</sup> H- <sup>1</sup> H COSY spectrum of trigonelline (3)                                                                 | 23 |
| <b>Figure S22.</b> HSQC spectrum of trigonelline (3)                                                                                                | 24 |
| <b>Figure S23.</b> HMBC spectrum of trigonelline (3)                                                                                                | 25 |
| <b>Figure S24.</b> NOESY spectrum of trigonelline (3)                                                                                               | 26 |
| <b>Figure S25.</b> HR-ESI-MS spectrum of 3-methylbutyl hydrodisulfide (4)                                                                           | 27 |
| <b>Figure S26.</b> <sup>1</sup> H NMR spectrum (DMSO- <i>d</i> <sub>6</sub> ) of 3-methylbutyl hydrodisulfide (4)                                   | 28 |
| <b>Figure S27.</b> <sup>13</sup> C NMR spectrum (DMSO- <i>d</i> <sub>6</sub> ) of 3-methylbutyl hydrodisulfide (4)                                  | 29 |
| <b>Figure S28.</b> Docking validation                                                                                                               | 30 |
| <b>Figure S29.</b> Plots of initial velocity versus enzyme concentration for the inhibition of compounds 1 and 2 on the hydrolysis activity of AChE | 30 |

**Figure S1.** HR-ESI-MS spectrum of martensine A (**1**)

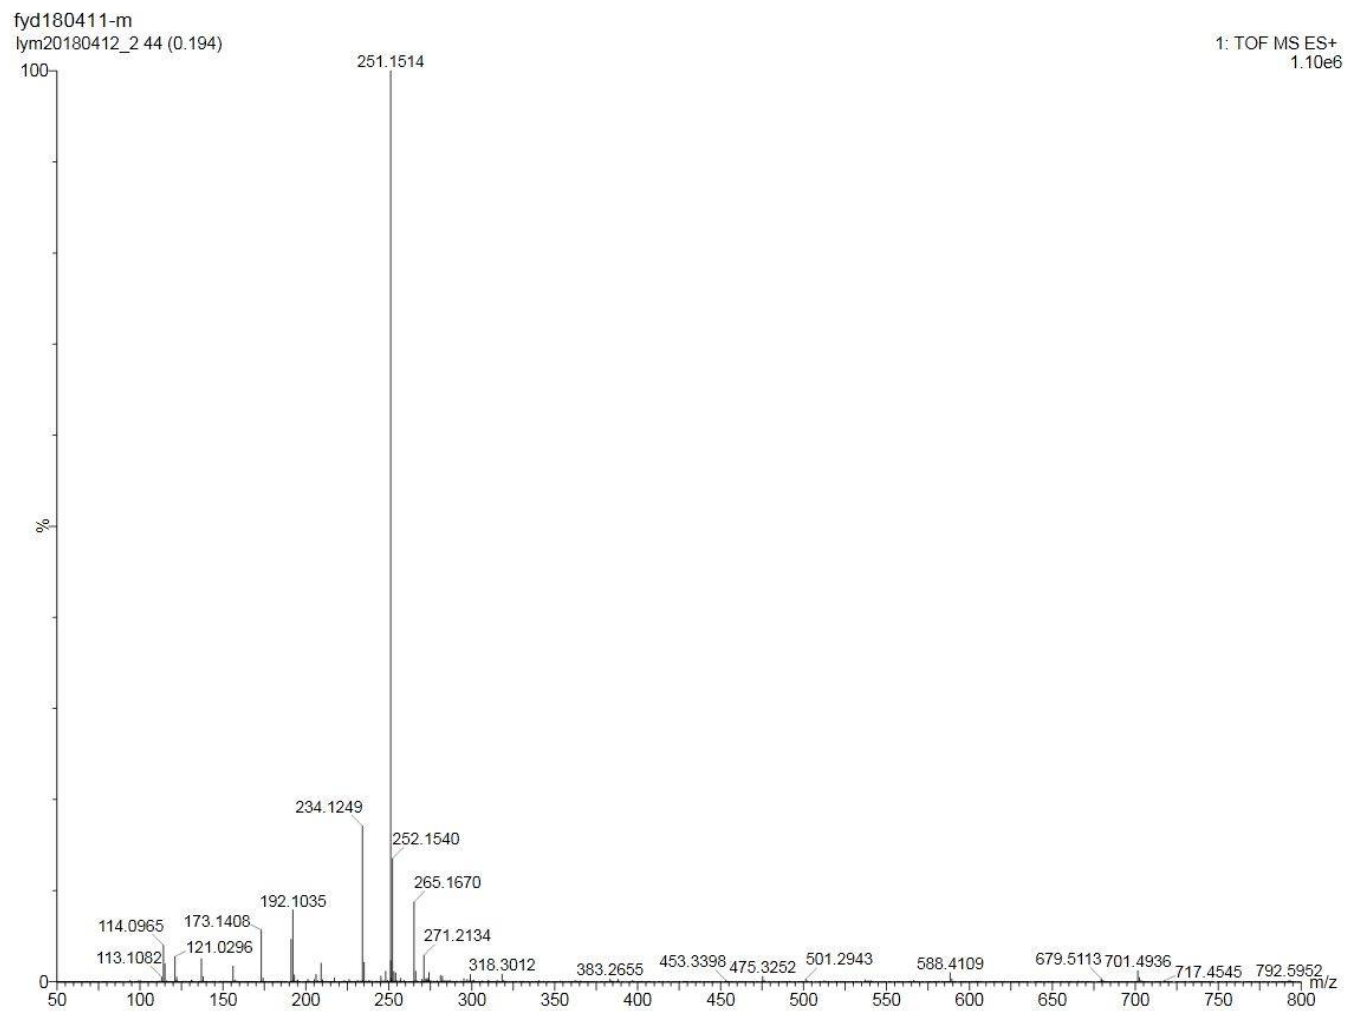

Figure S2. HR-ESI-MS<sup>2</sup> spectrum ( $M' = 251.1514$  [ $M+H$ ]<sup>+</sup>) of martensine A (1)

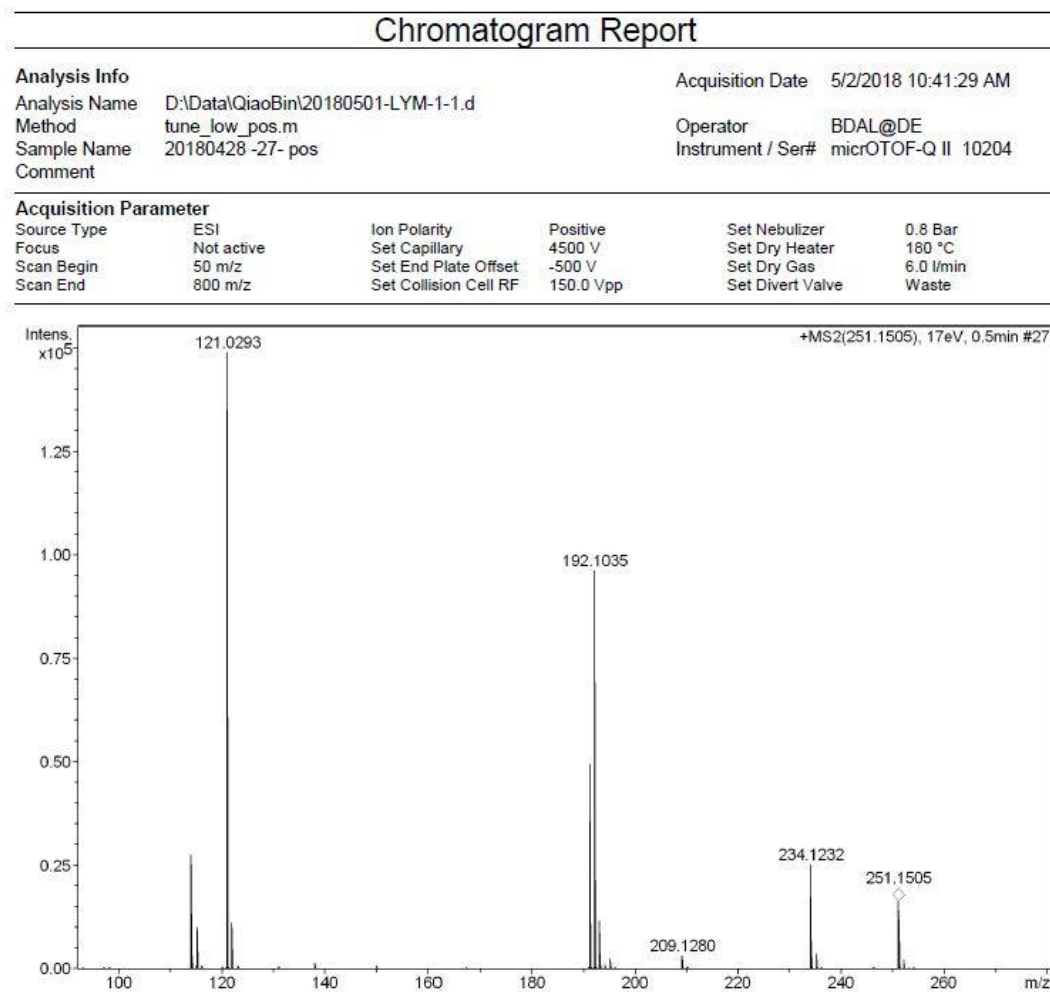

**Figure S3.**  $^1\text{H}$  NMR spectrum ( $\text{CD}_3\text{OD}$ ) of martensine A (**1**)

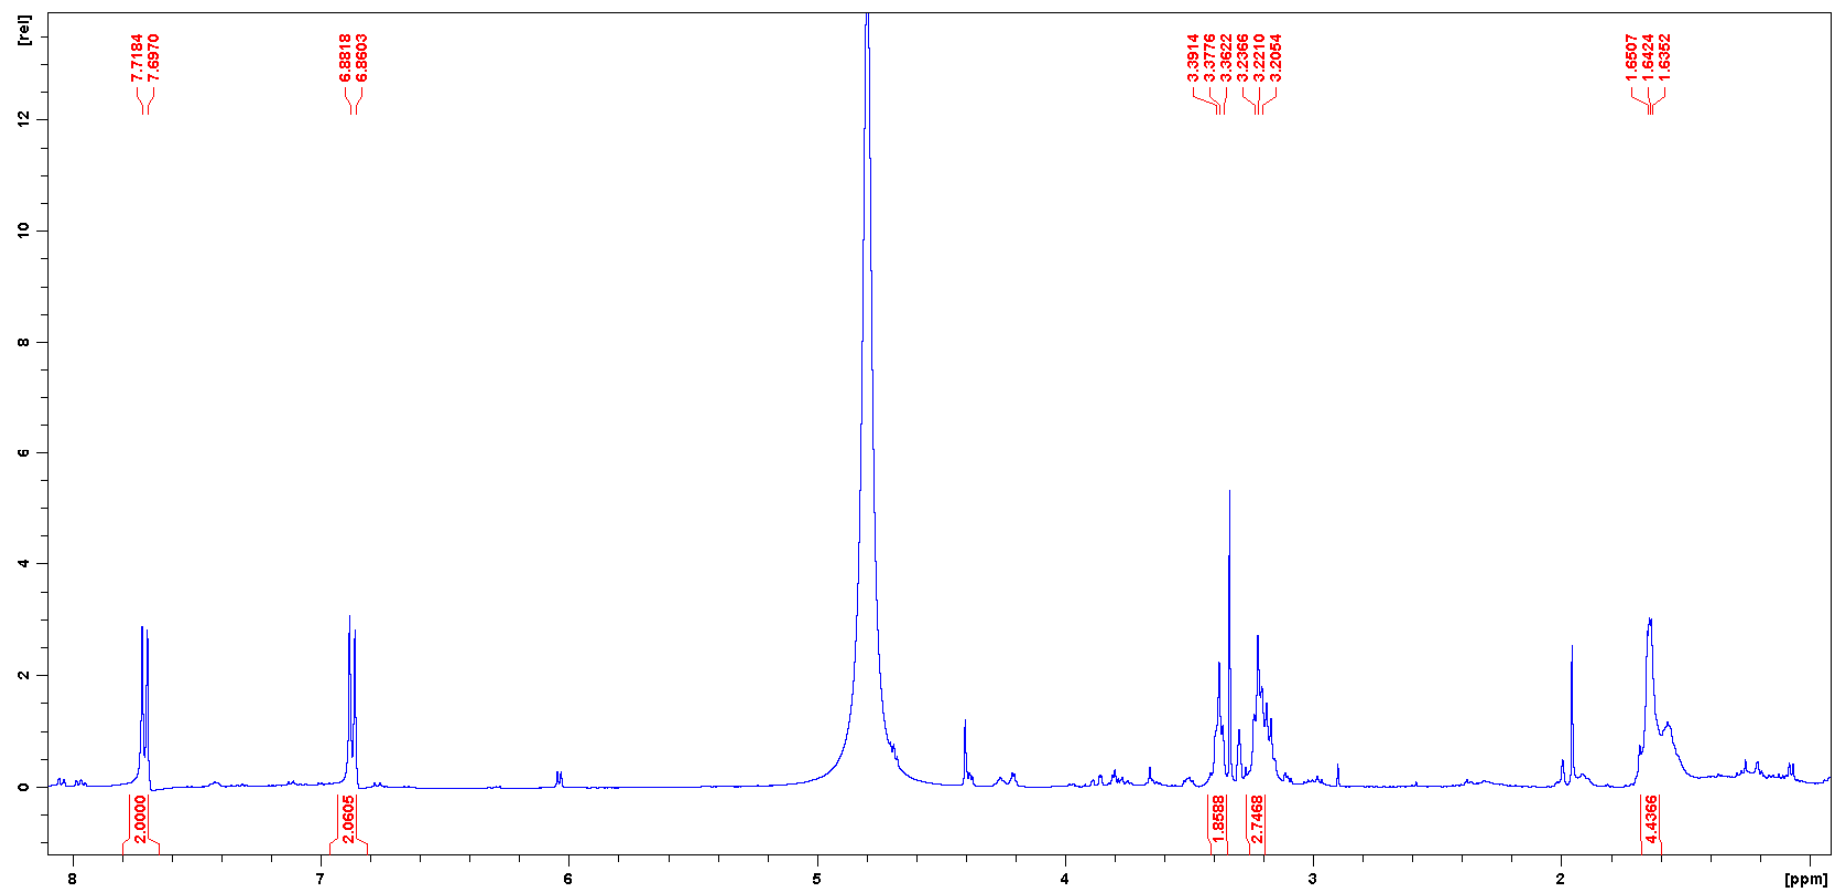

**Figure S4.**  $^{13}\text{C}$  NMR spectrum ( $\text{CD}_3\text{OD}$ ) of martensine A (**1**)

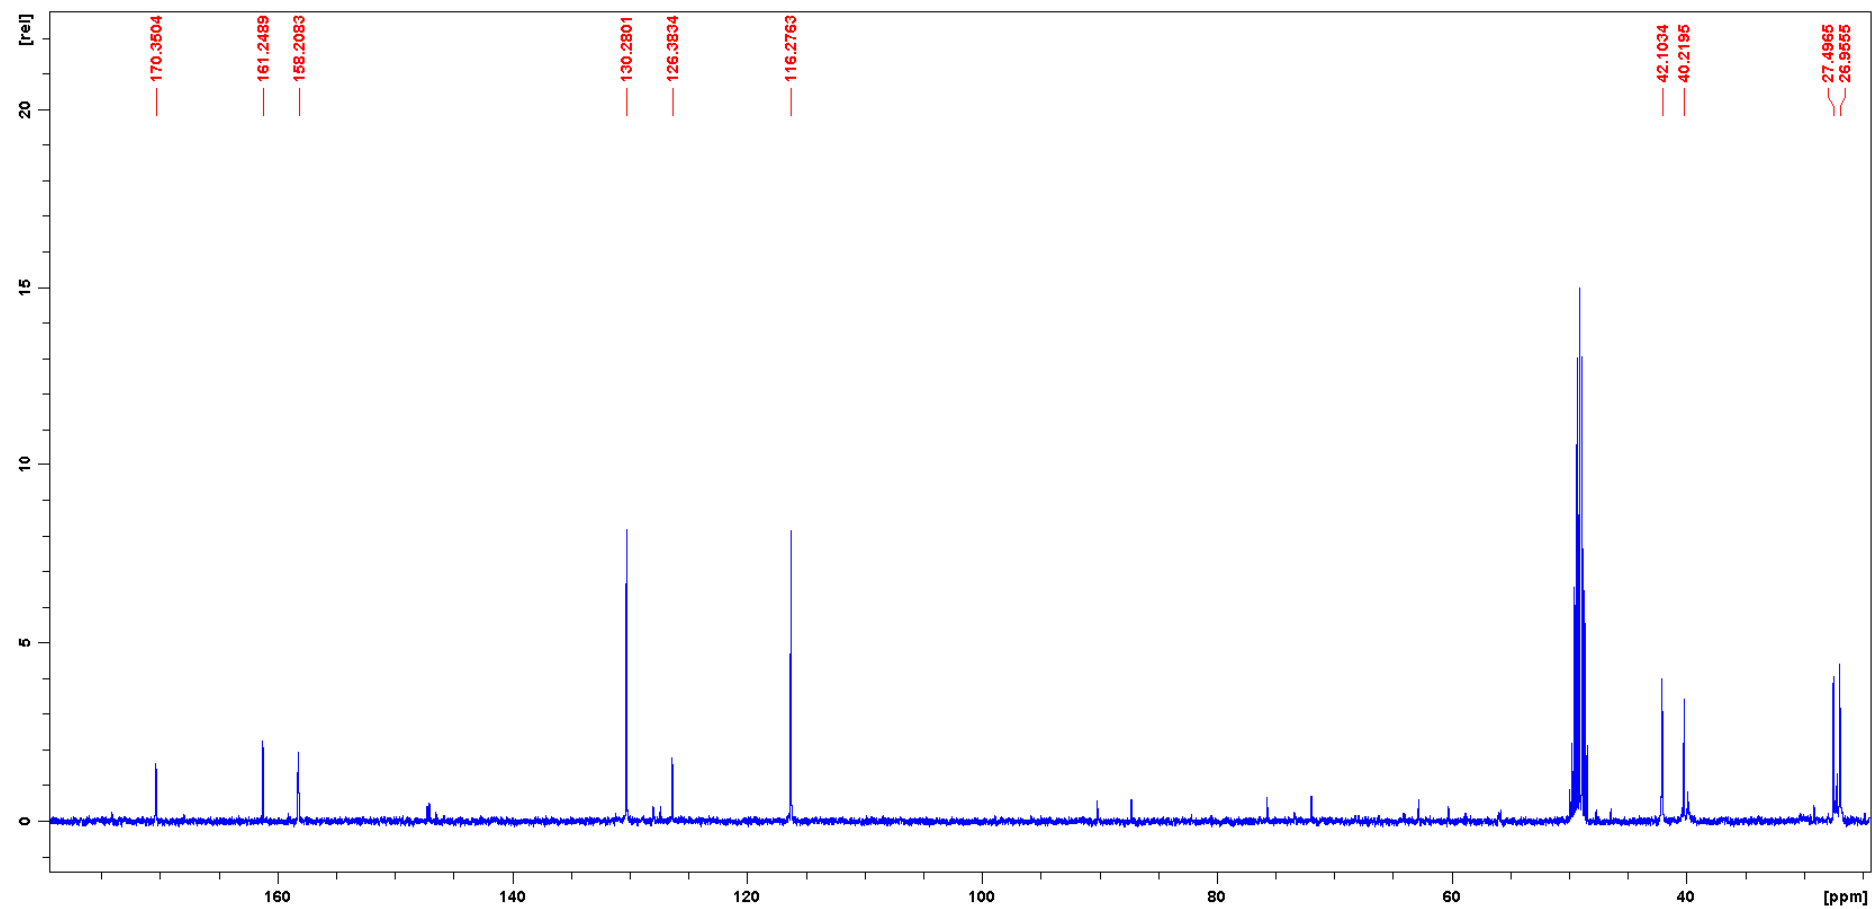

**Figure S5.** DEPT 135 spectrum of martensine A (**1**)

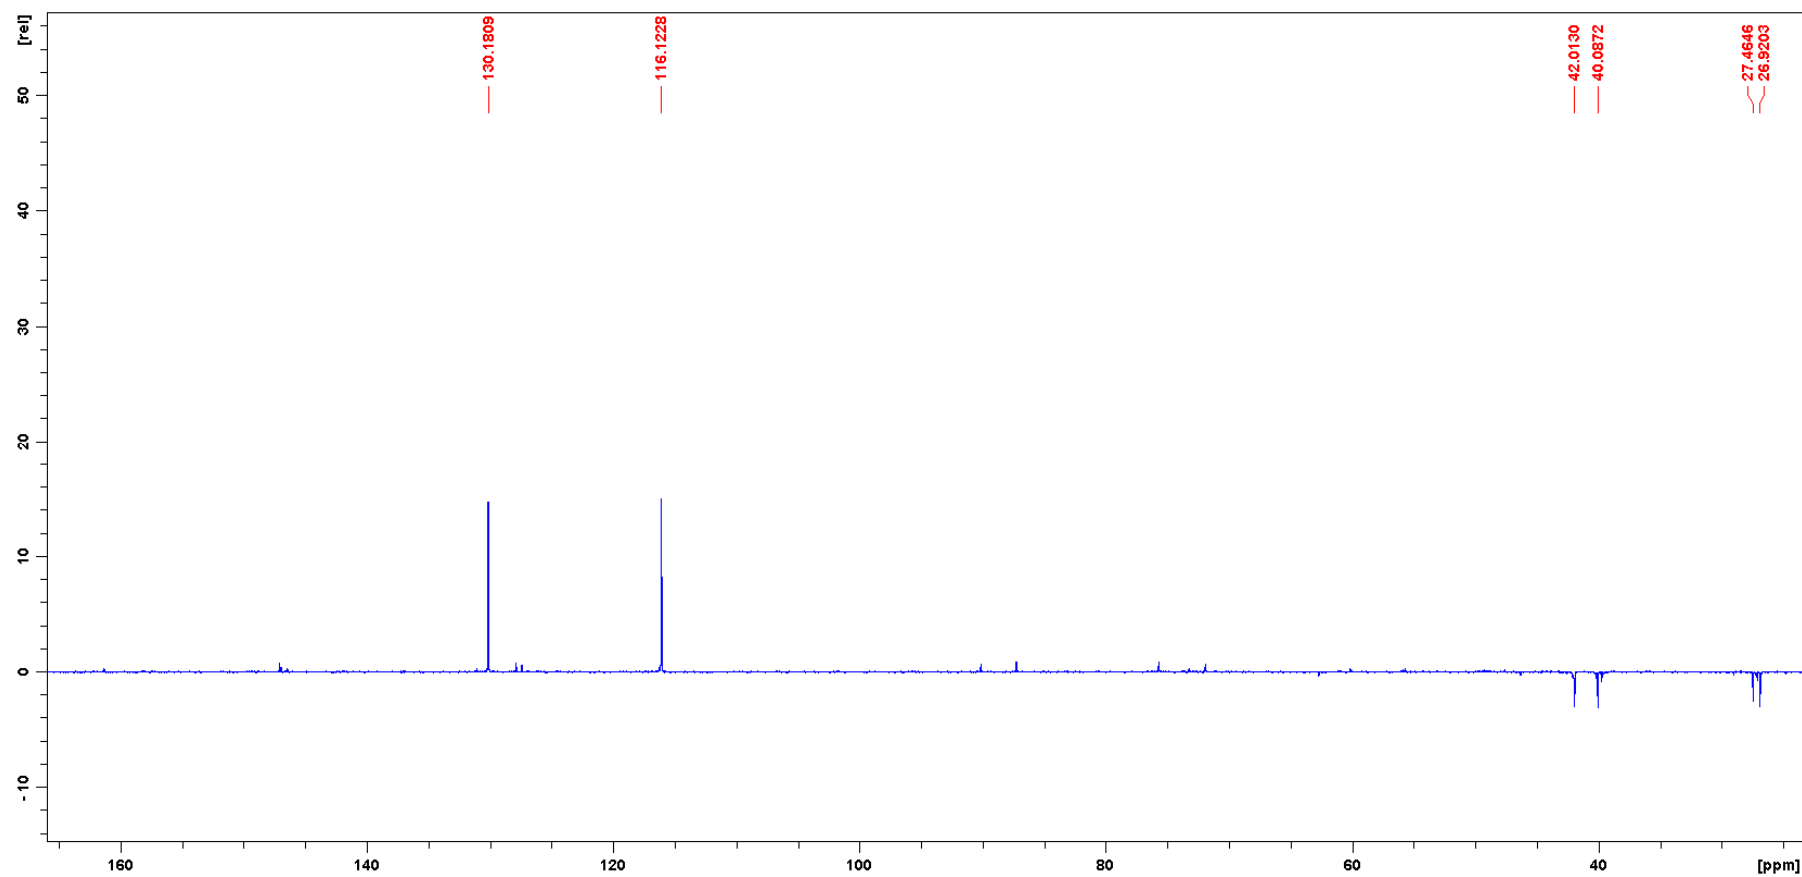



**Figure S7.** HSQC spectrum of martensine A (**1**)

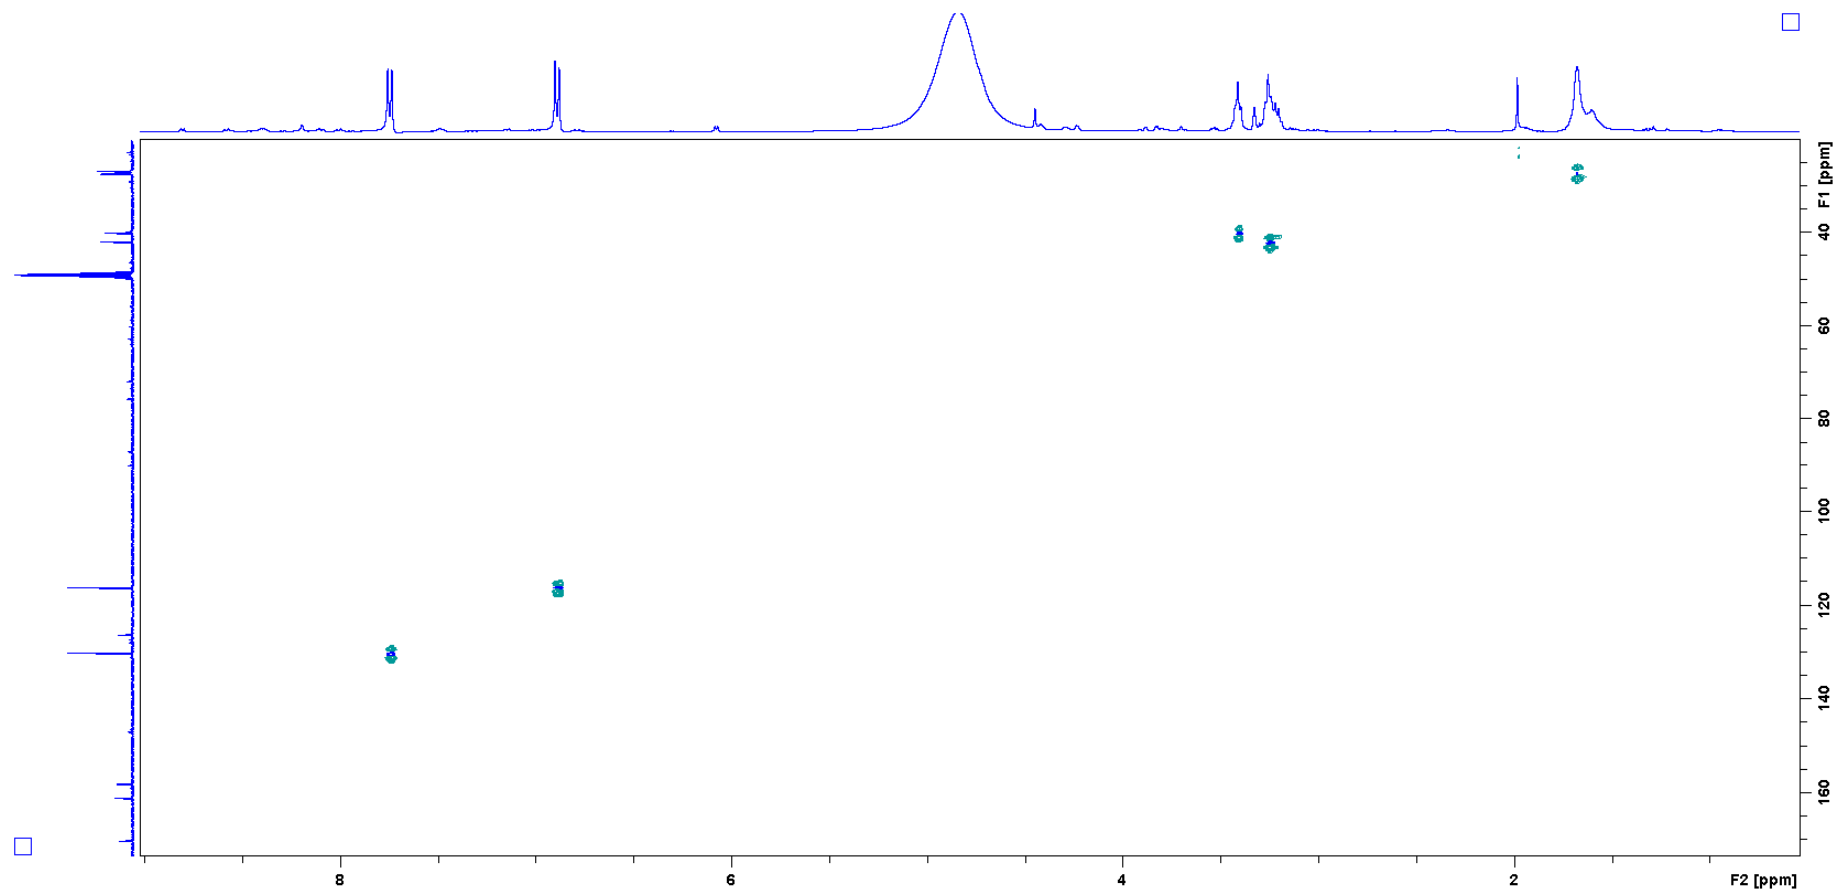

**Figure S8.** HMBC spectrum of martensine A (**1**)

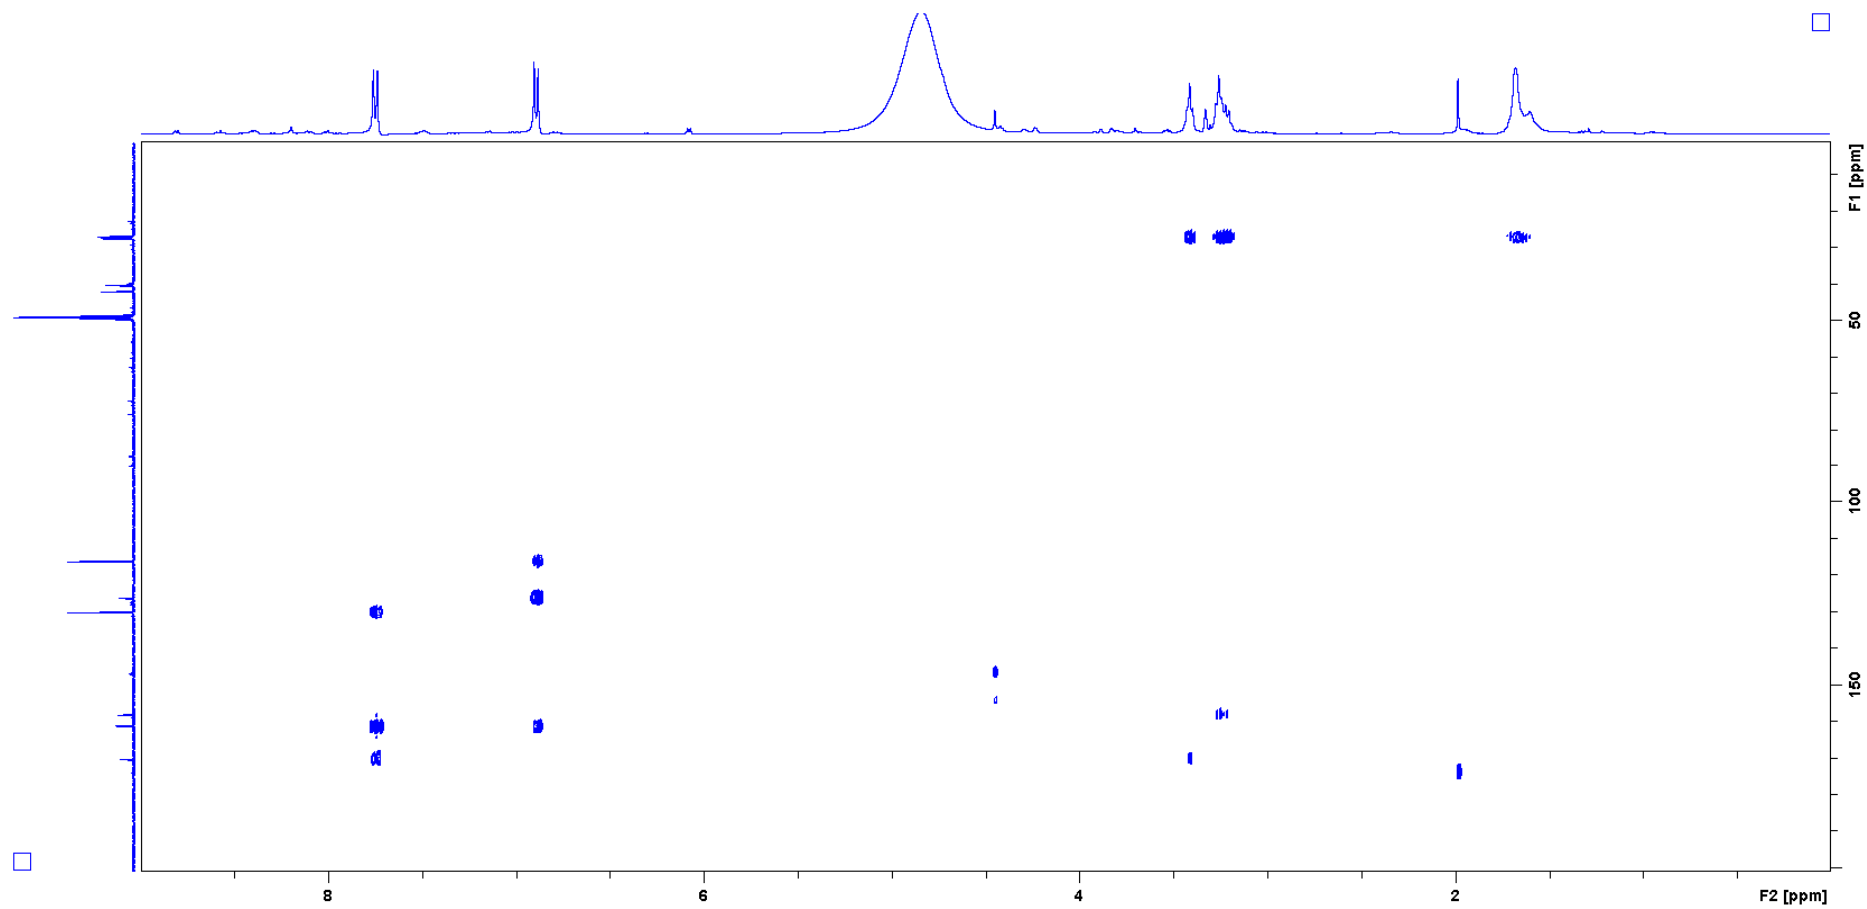

**Figure S9.** NOESY spectrum of martensine A (**1**)

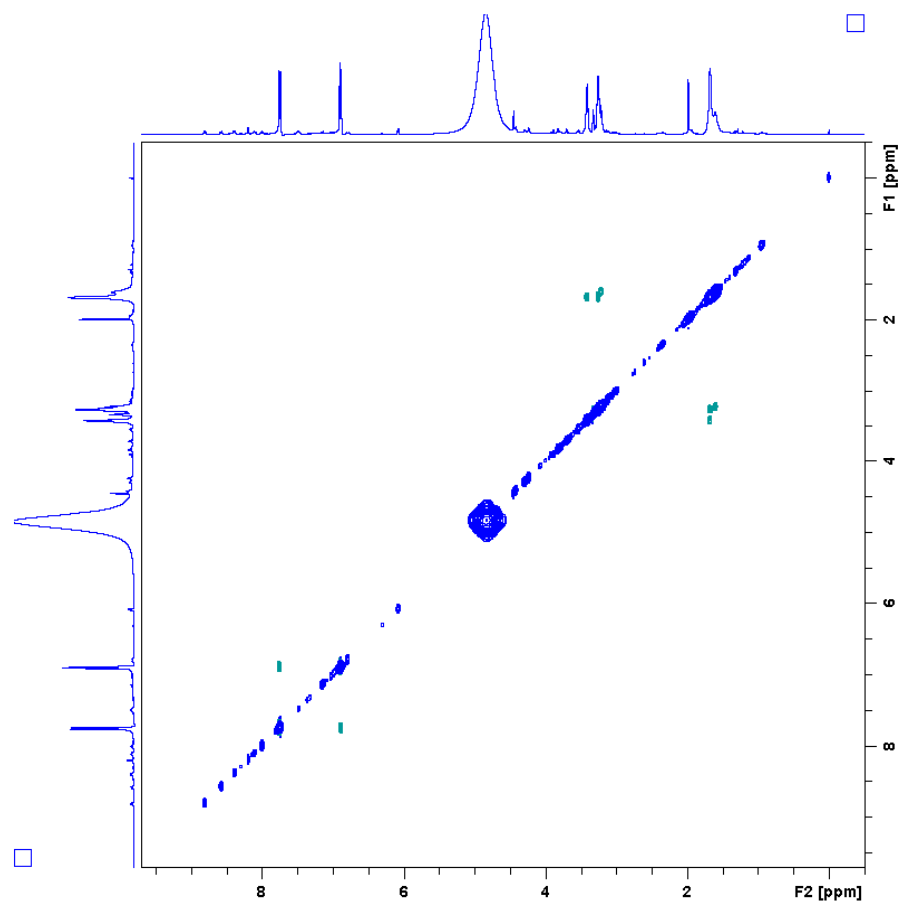

**Figure S10.** HR-ESI-MS spectrum of martensine B (**2**)

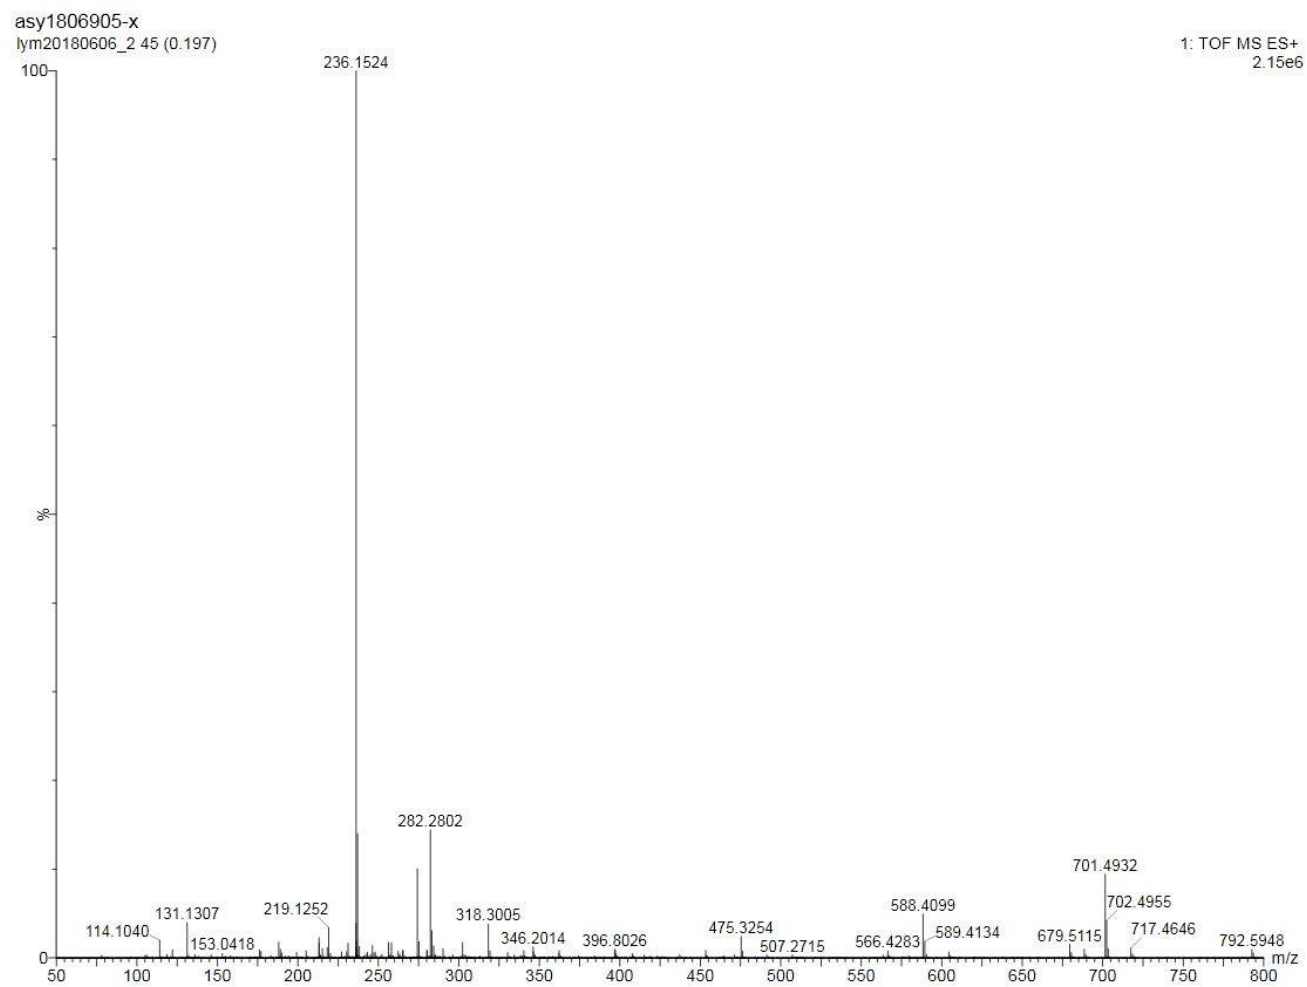

**Figure S11.**  $^1\text{H}$  NMR spectrum ( $\text{CD}_3\text{OD}$ ) of martensine B (**2**)

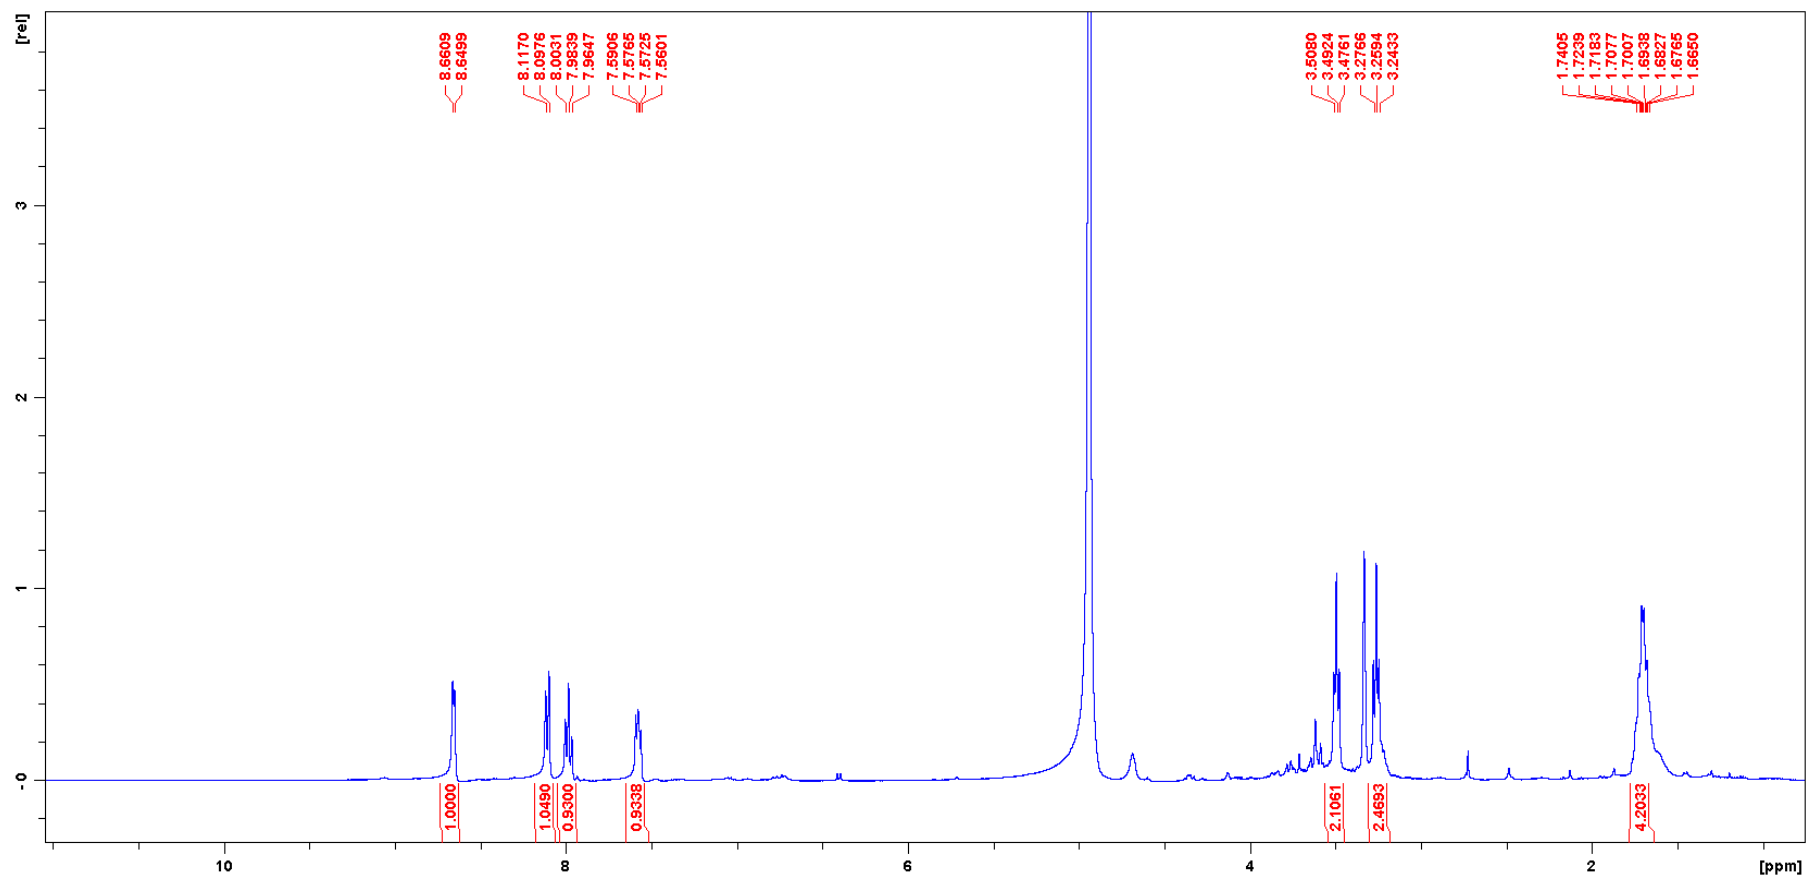

**Figure S12.**  $^{13}\text{C}$  NMR spectrum ( $\text{CD}_3\text{OD}$ ) of martensine B (**2**)

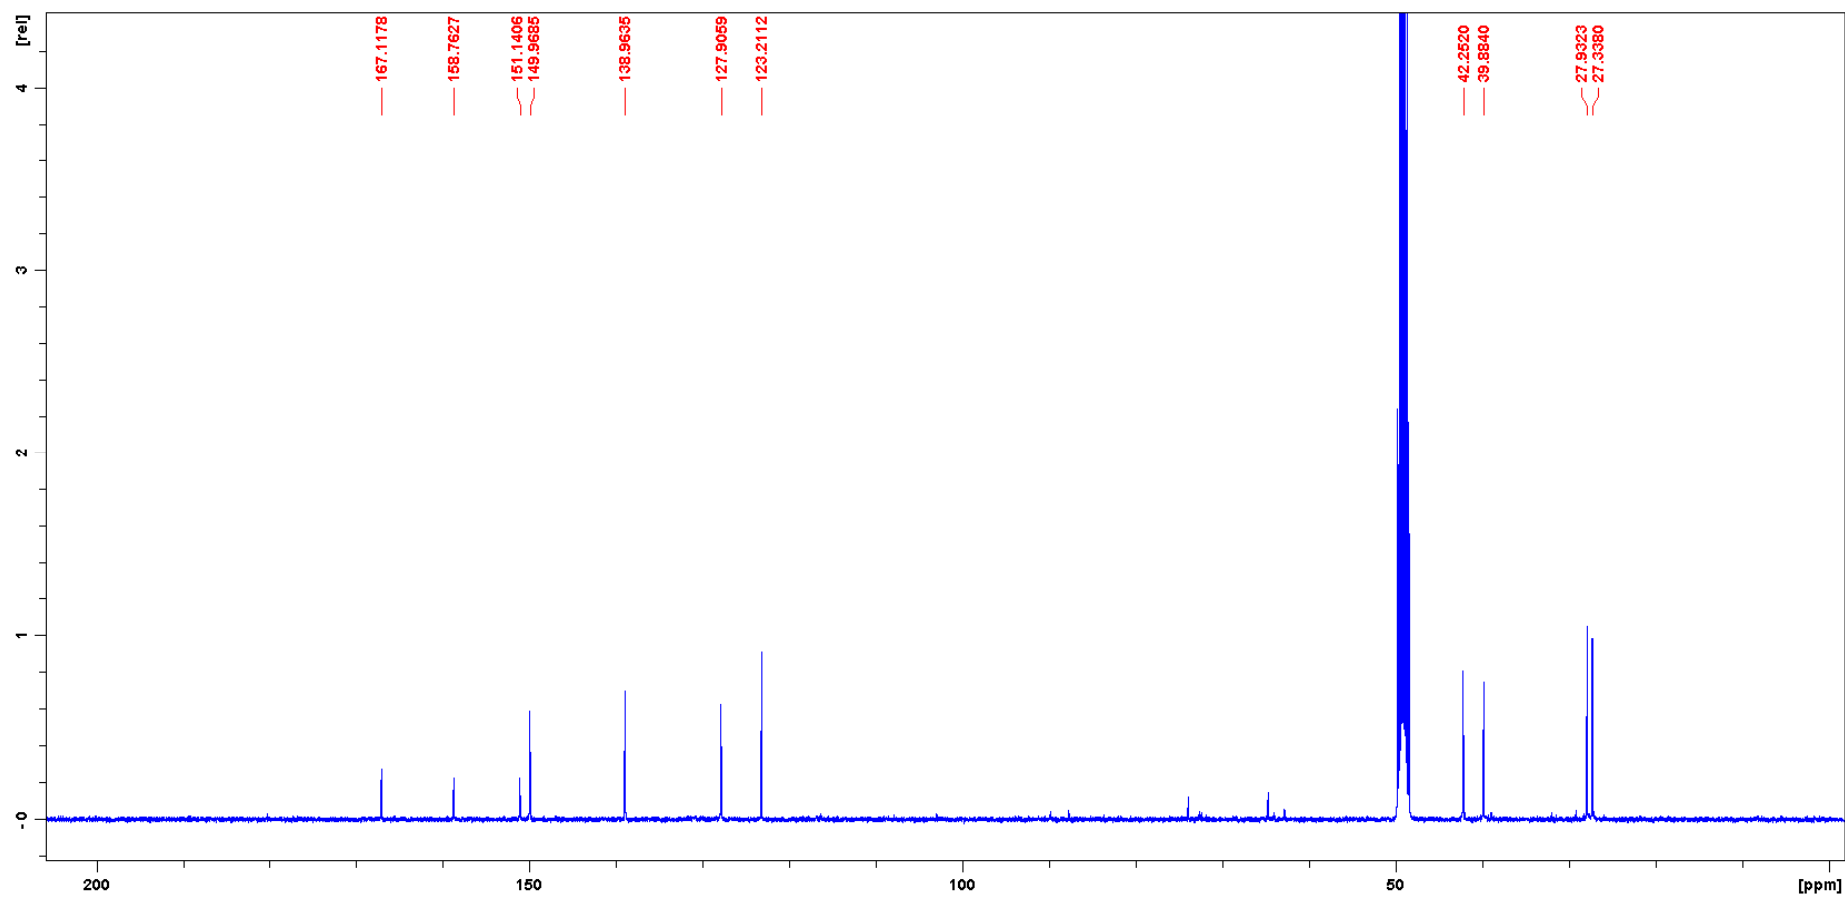

**Figure S13.** DEPT 135 spectrum of martensine B (2)

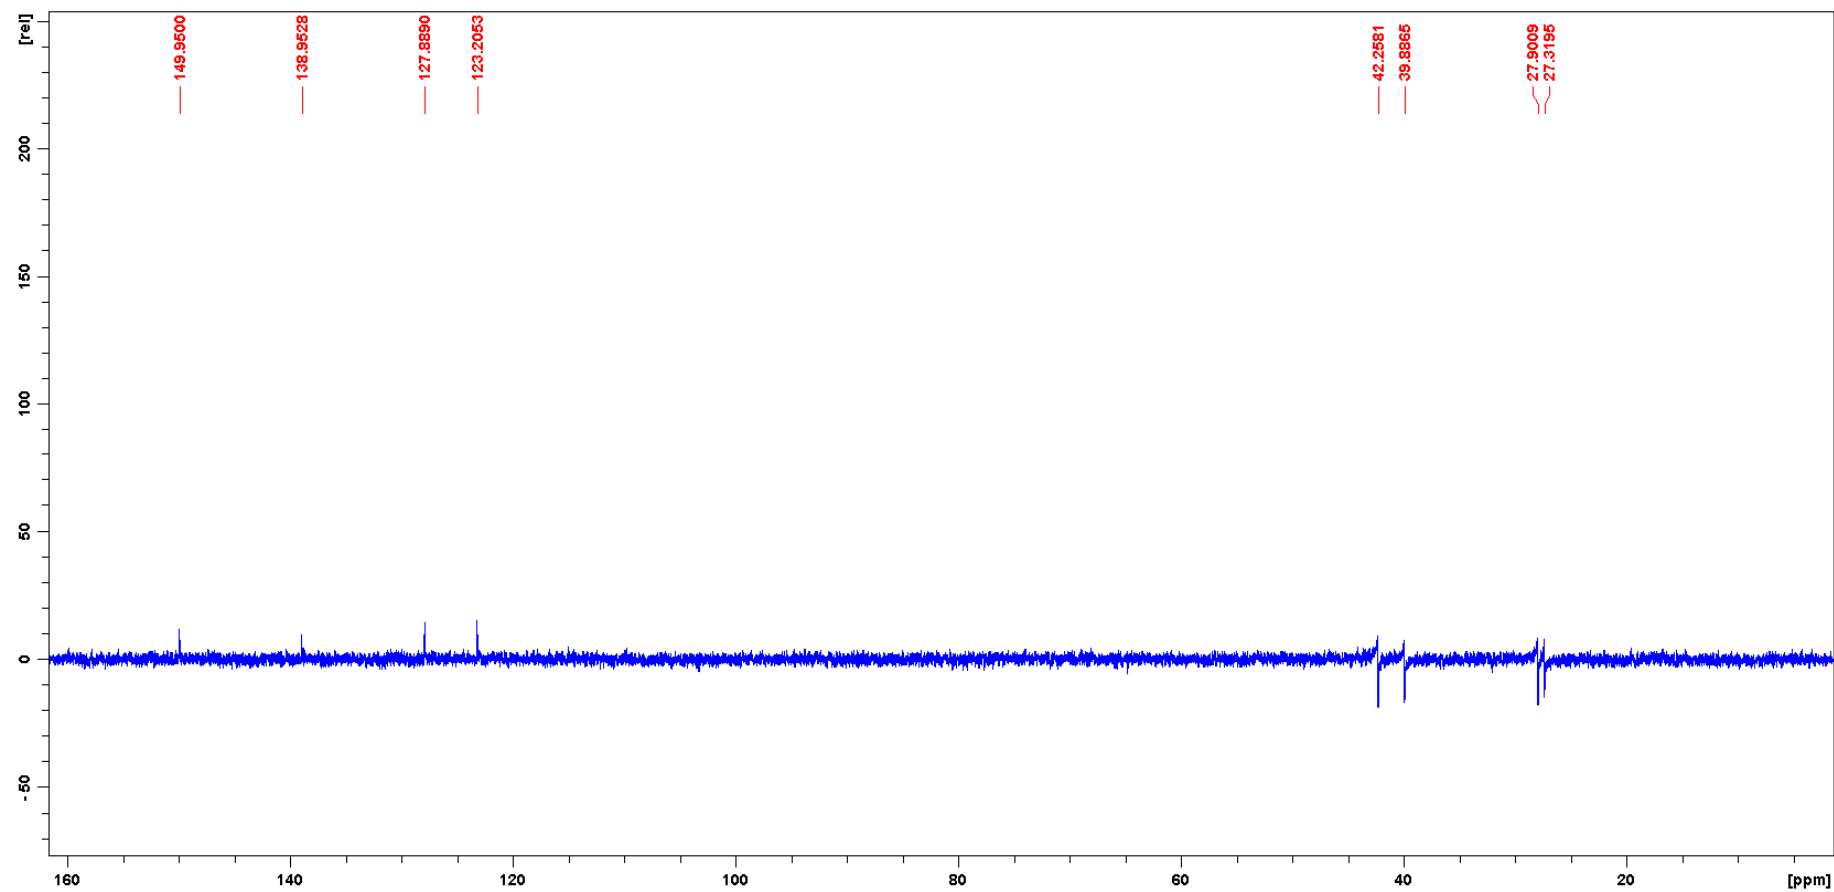

**Figure S14.**  $^1\text{H}$ - $^1\text{H}$  COSY spectrum of martensine B (**2**)

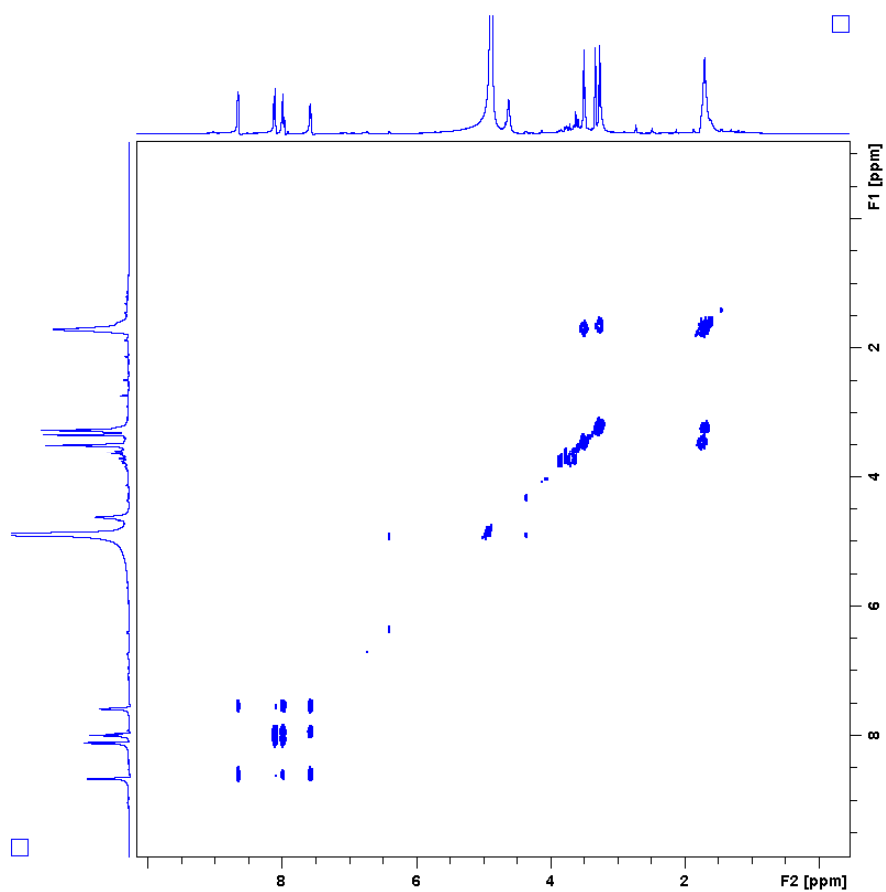

**Figure S15.** HSQC spectrum of martensine B (**2**)

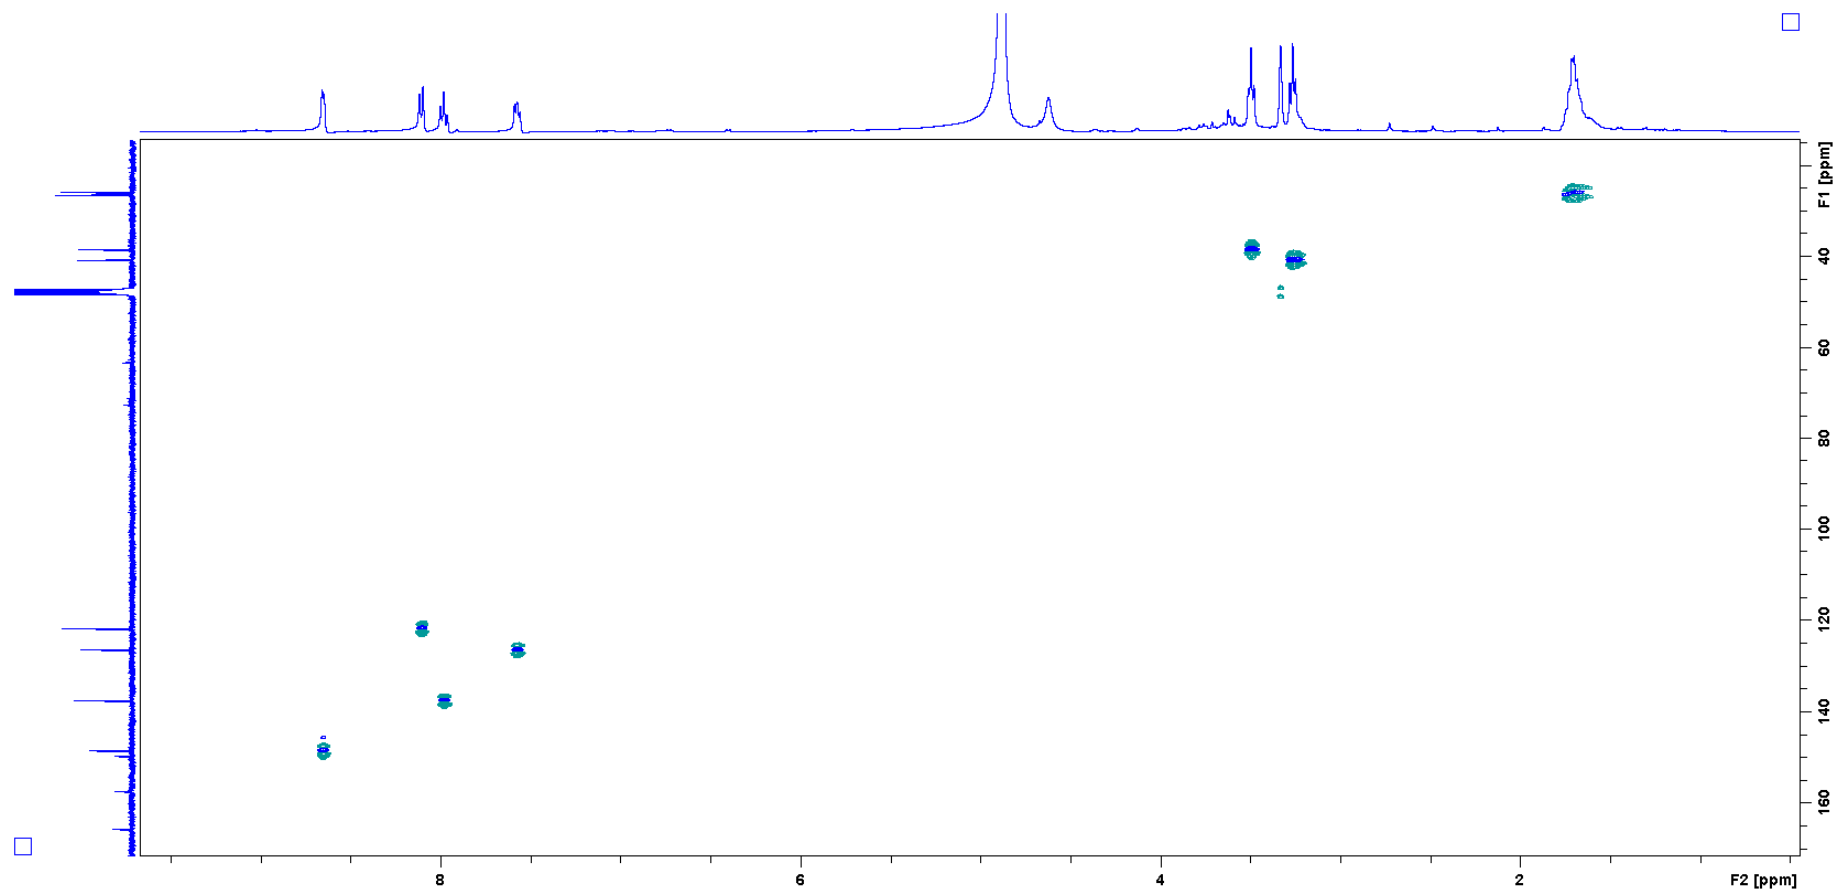

**Figure S16.** HMBC spectrum of martensine B (2)

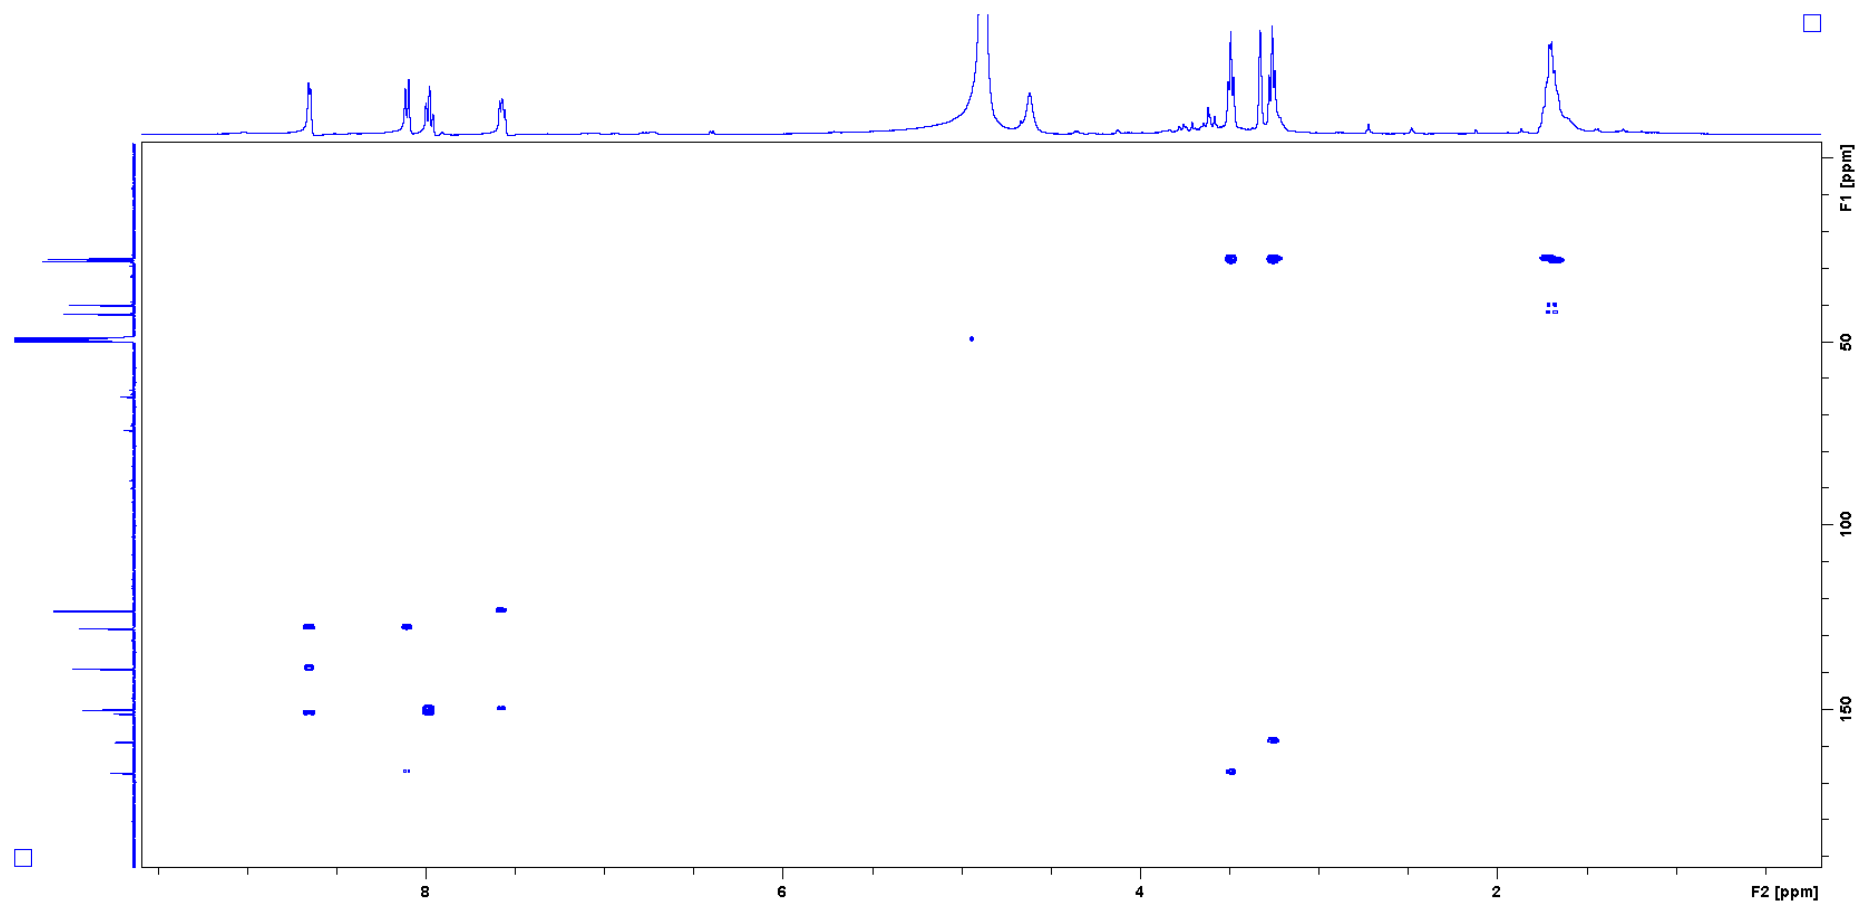

**Figure S17.** NOESY spectrum of martensine B (2)

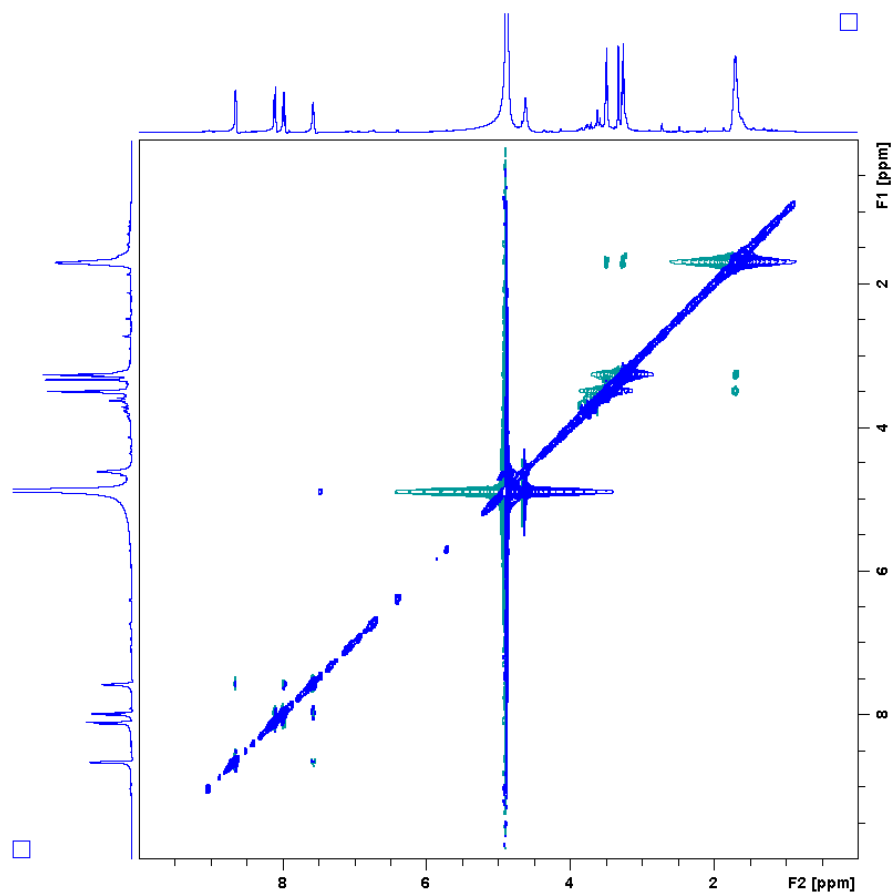

**Figure S18.** HR-ESI-MS spectrum of trigonelline (**3**)

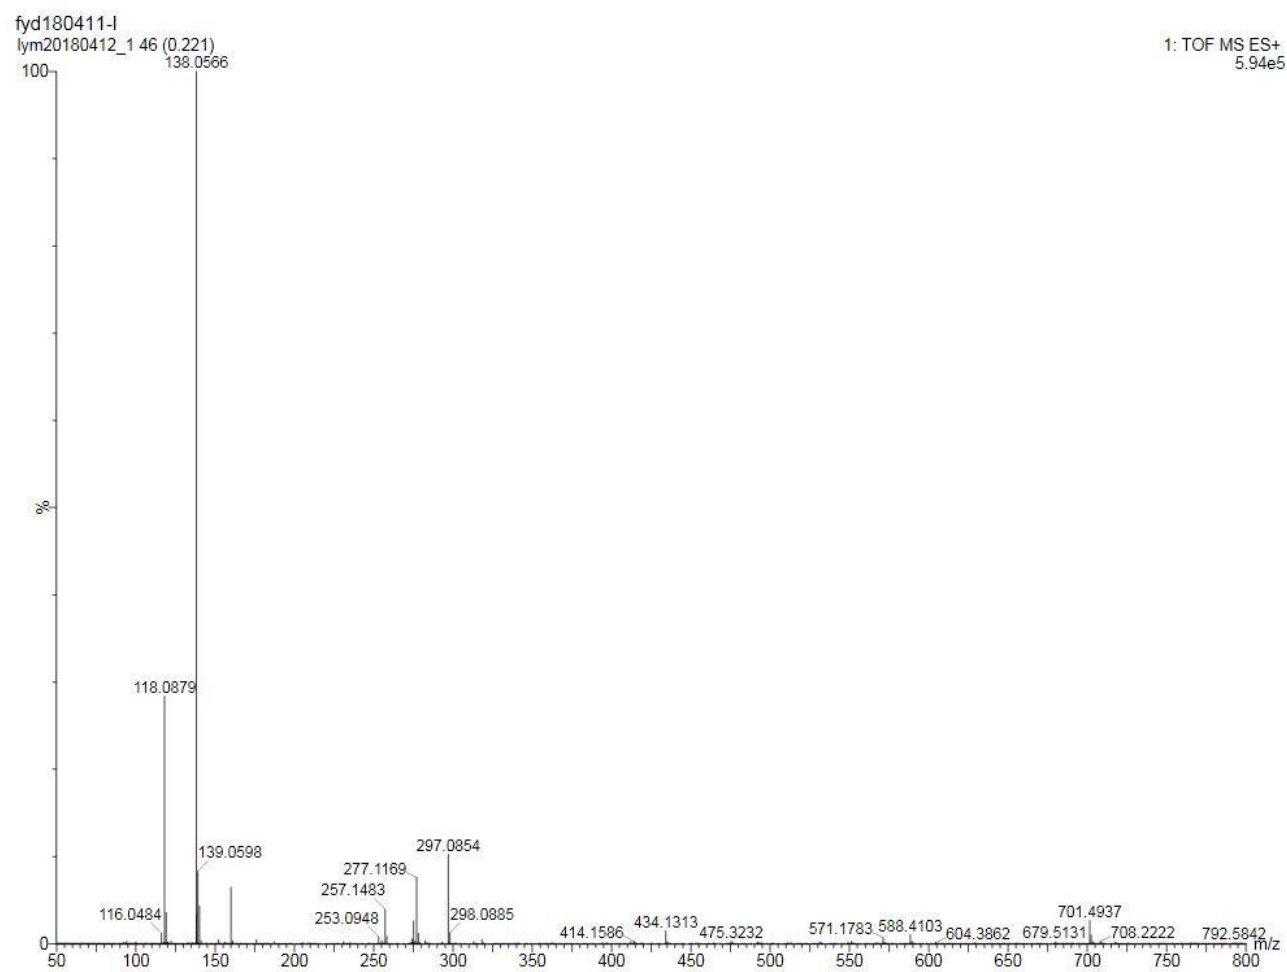

**Figure S19.**  $^1\text{H}$  NMR spectrum ( $\text{CD}_3\text{OD}$ ) of trigonelline (**3**)

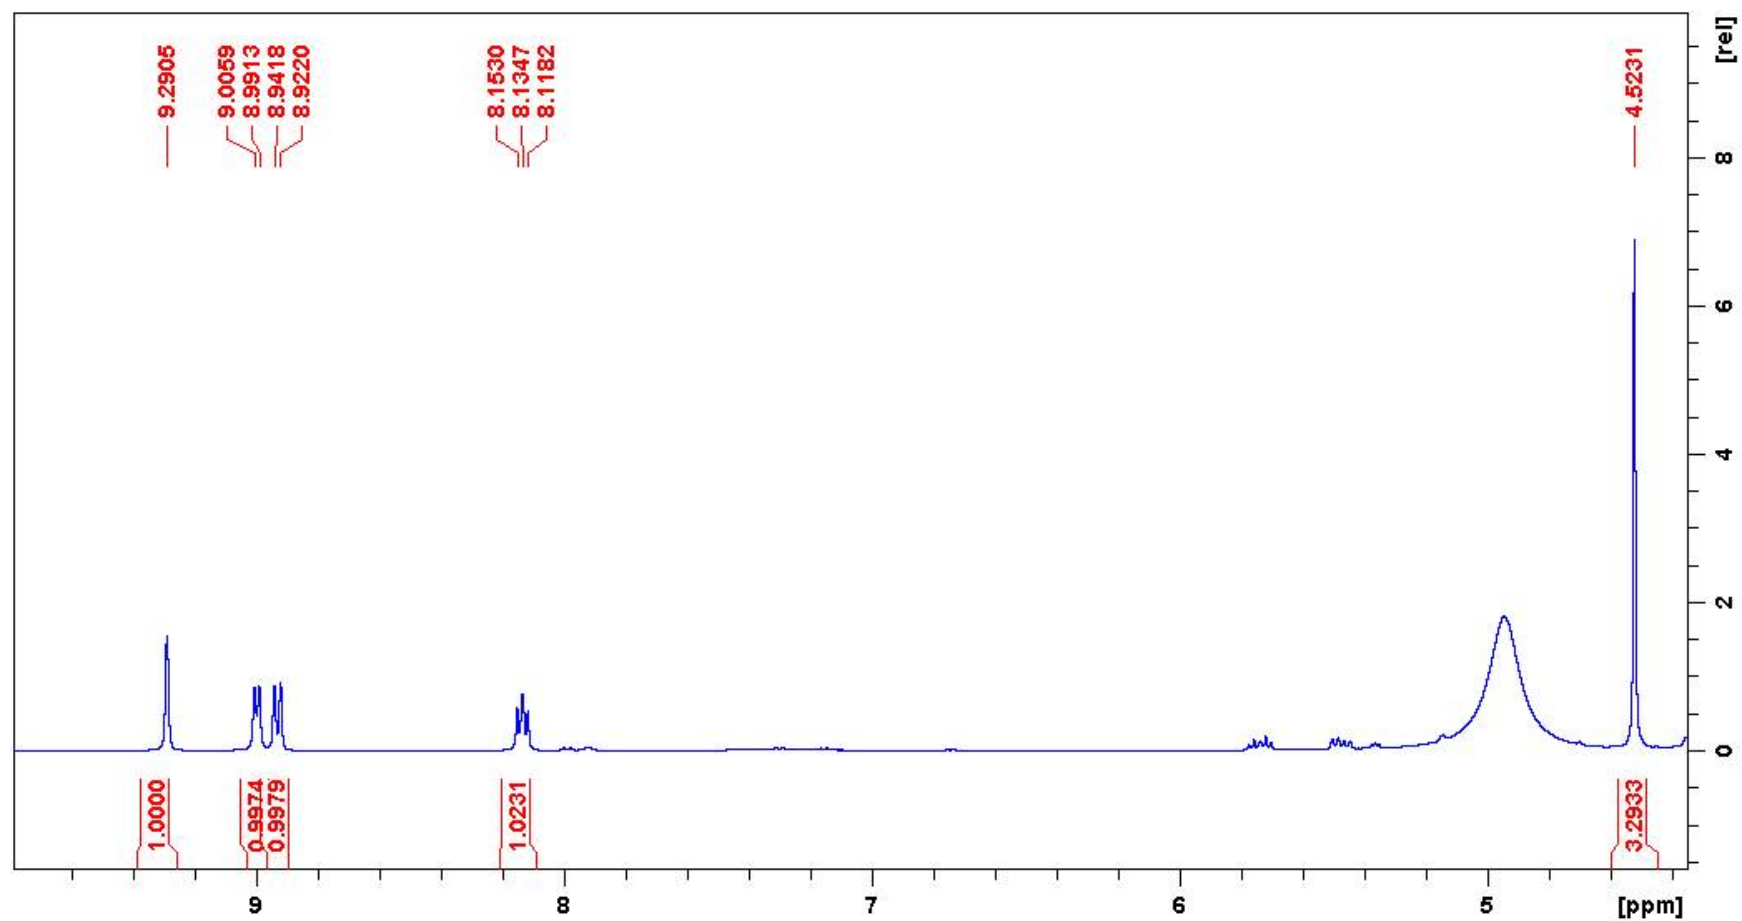

**Figure S20.**  $^{13}\text{C}$  NMR spectrum ( $\text{CD}_3\text{OD}$ ) of trigonelline (**3**)

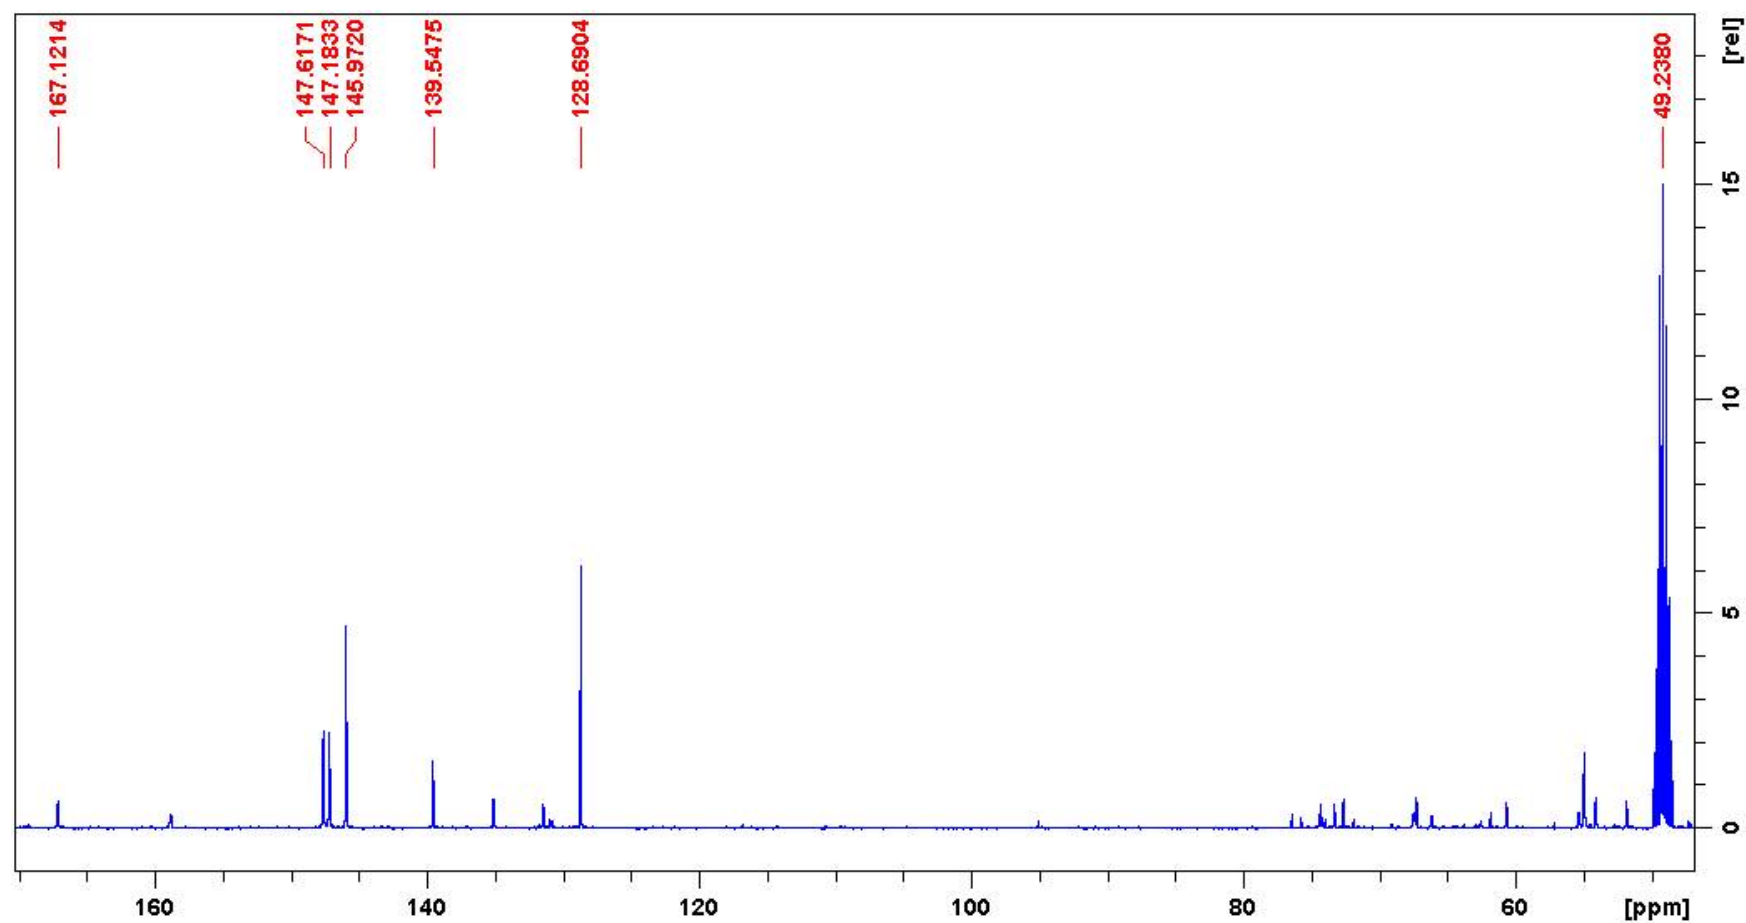

**Figure S21.**  $^1\text{H}$ - $^1\text{H}$  COSY spectrum of trigonelline (**3**)

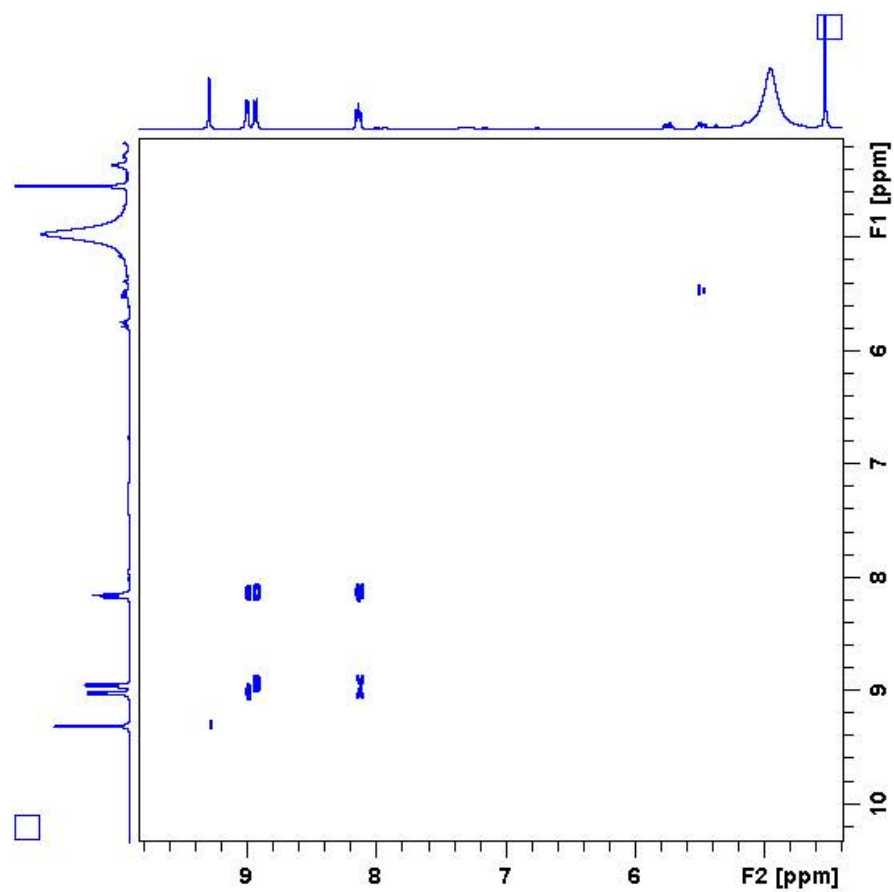

**Figure S22.** HSQC spectrum of trigonelline (**3**)

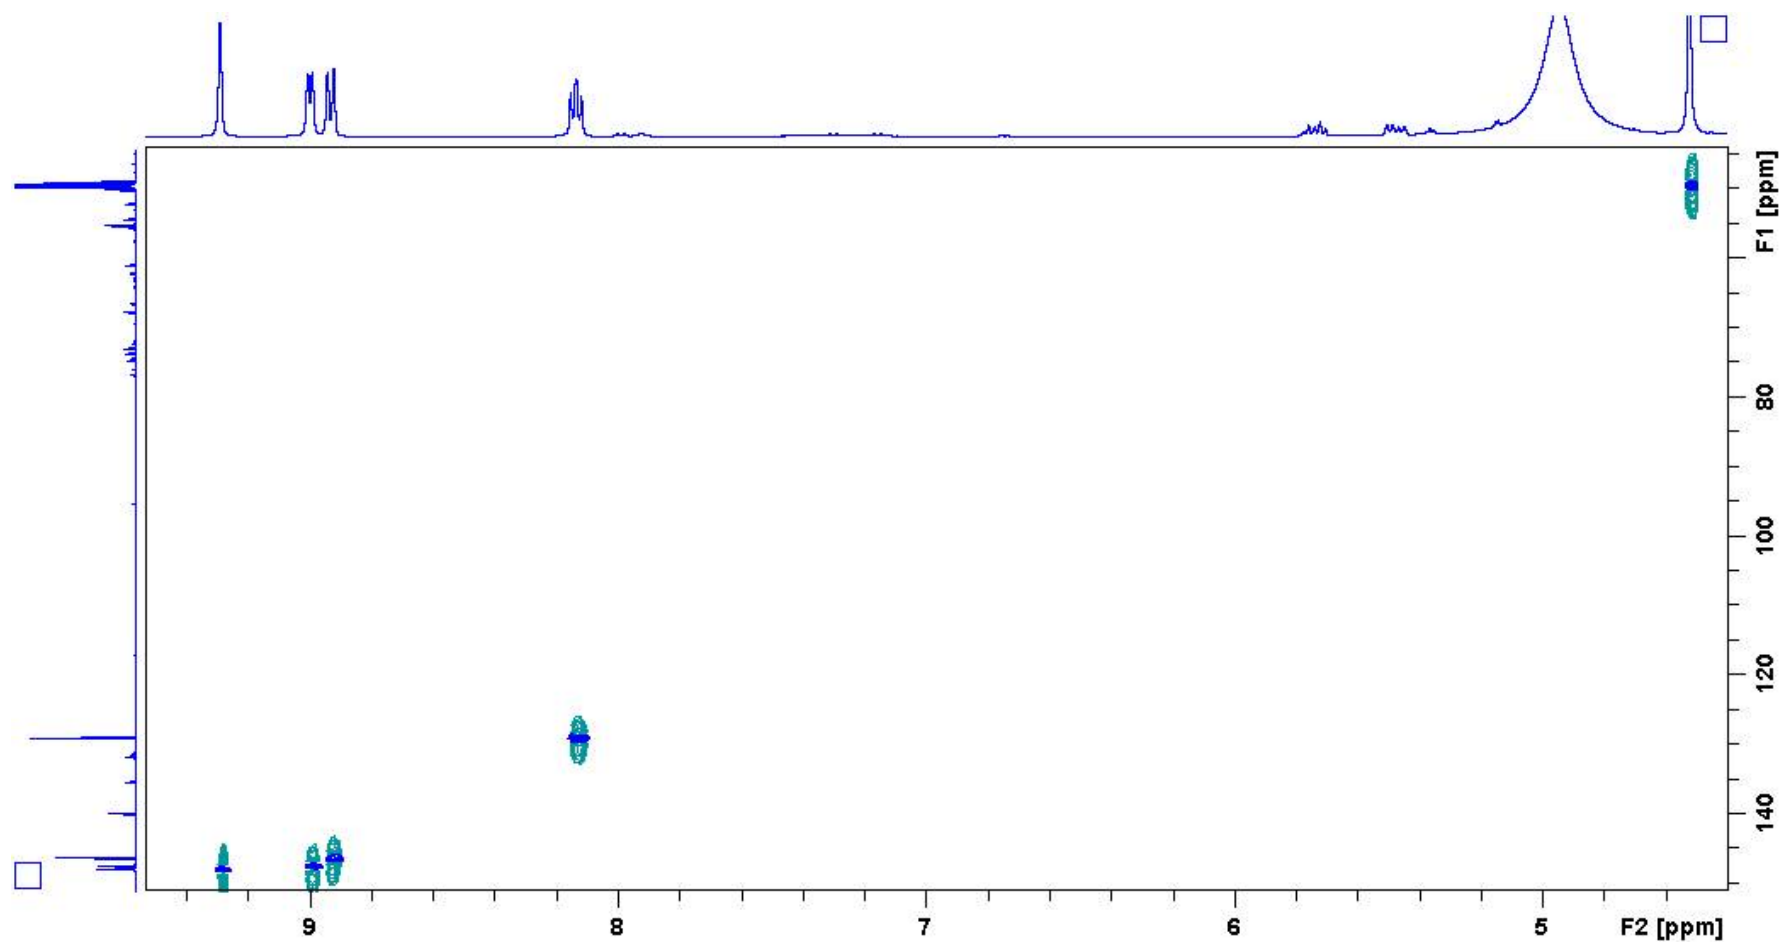

**Figure S23.** HMBC spectrum of trigonelline (**3**)

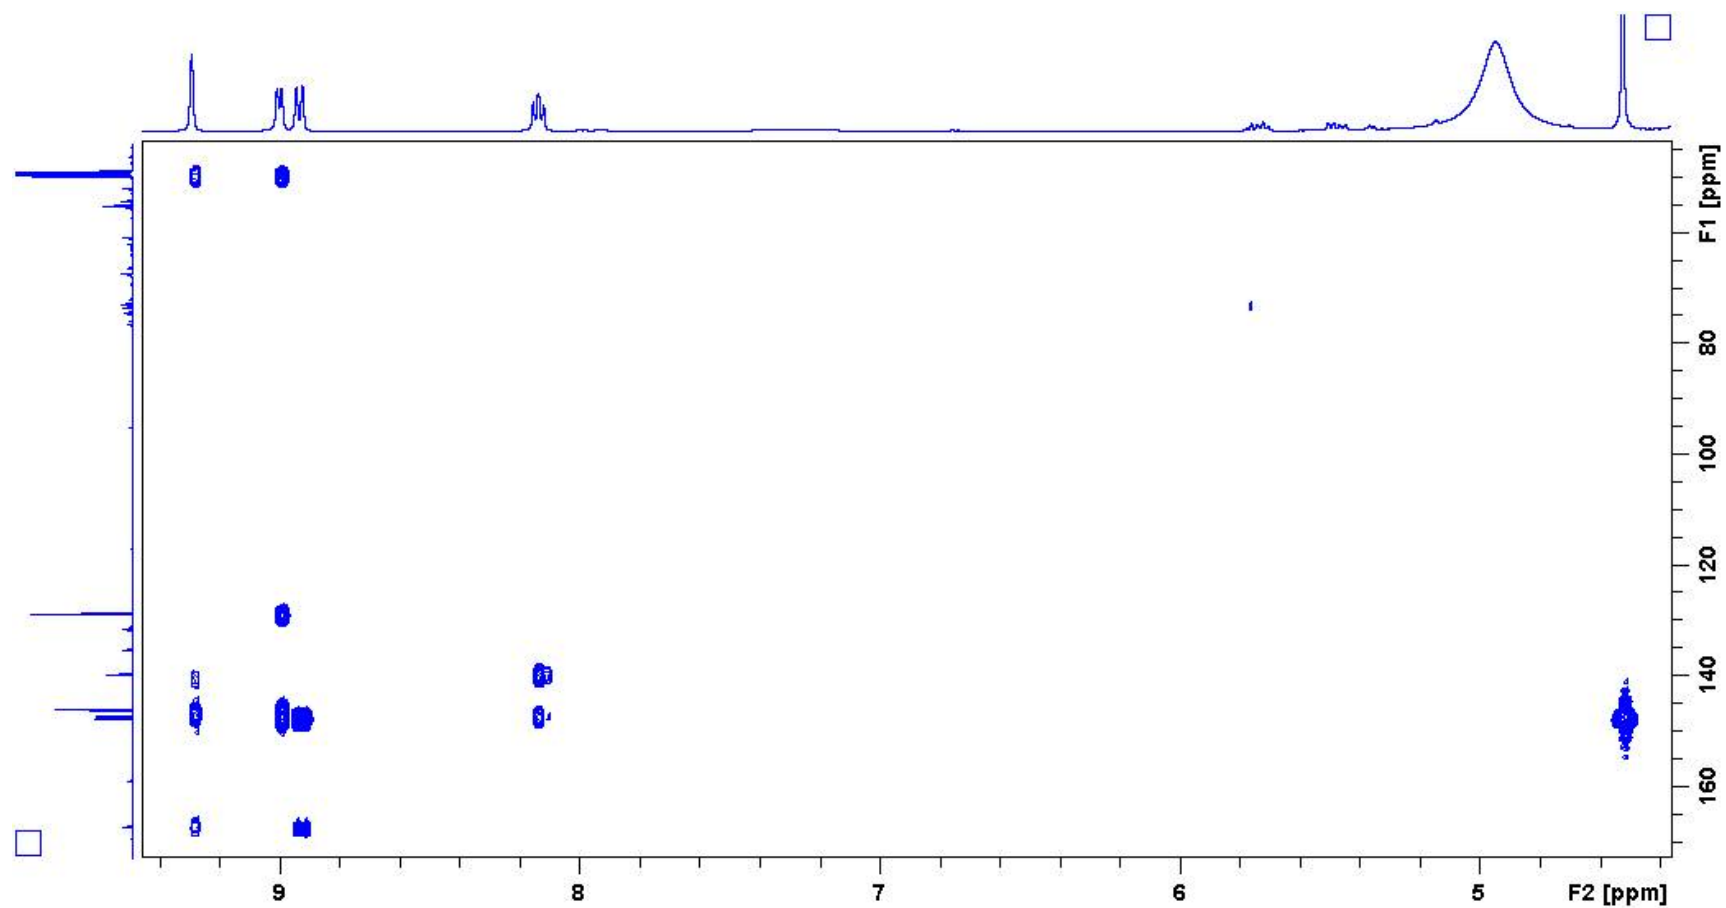

**Figure S24.** NOESY spectrum of trigonelline (**3**)

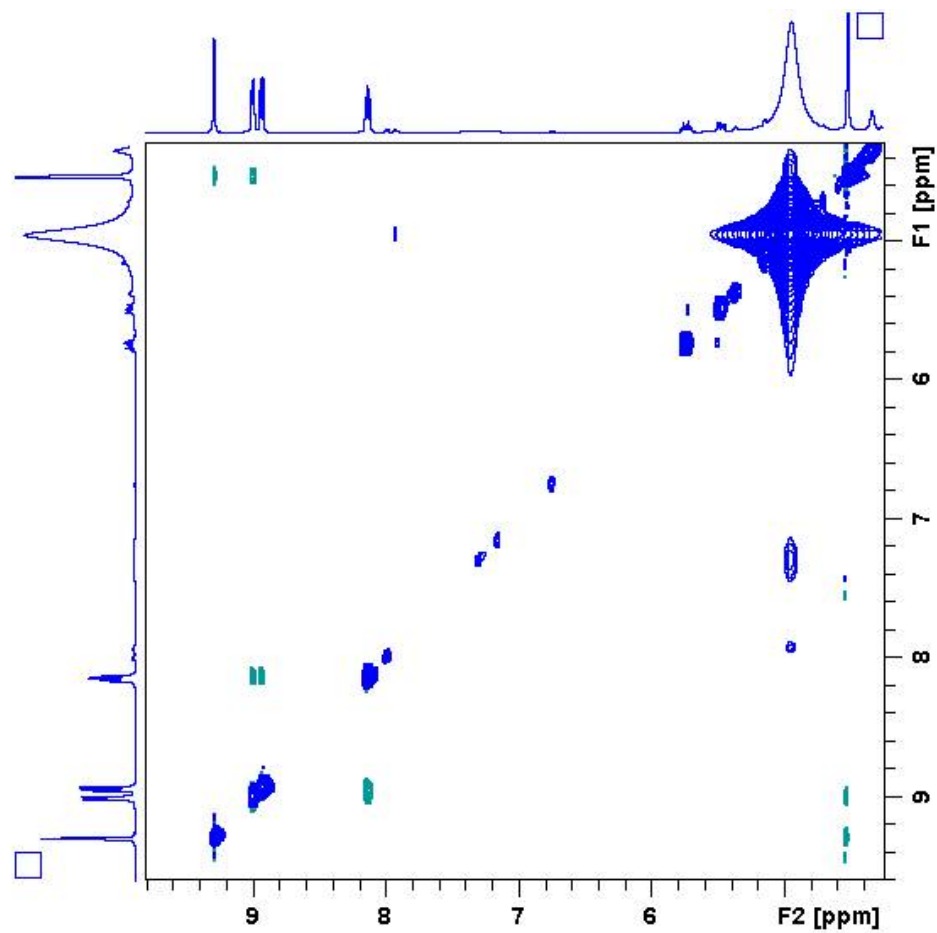

**Figure S25.** HR-ESI-MS spectrum of 3-methylbutyl hydrodisulfide (**4**)

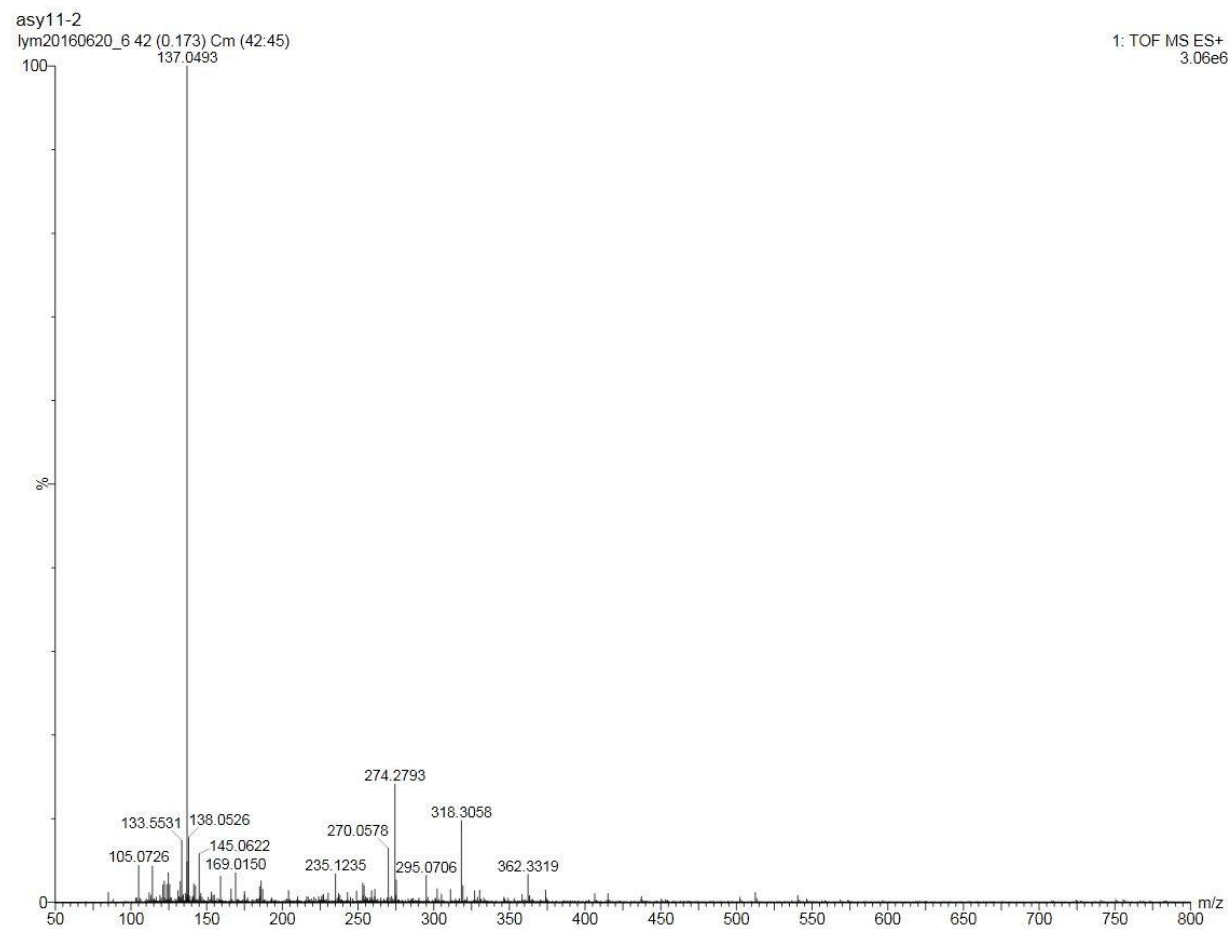

**Figure S26.**  $^1\text{H}$  NMR spectrum ( $\text{DMSO-}d_6$ ) of 3-methylbutyl hydrodisulfide (**4**)

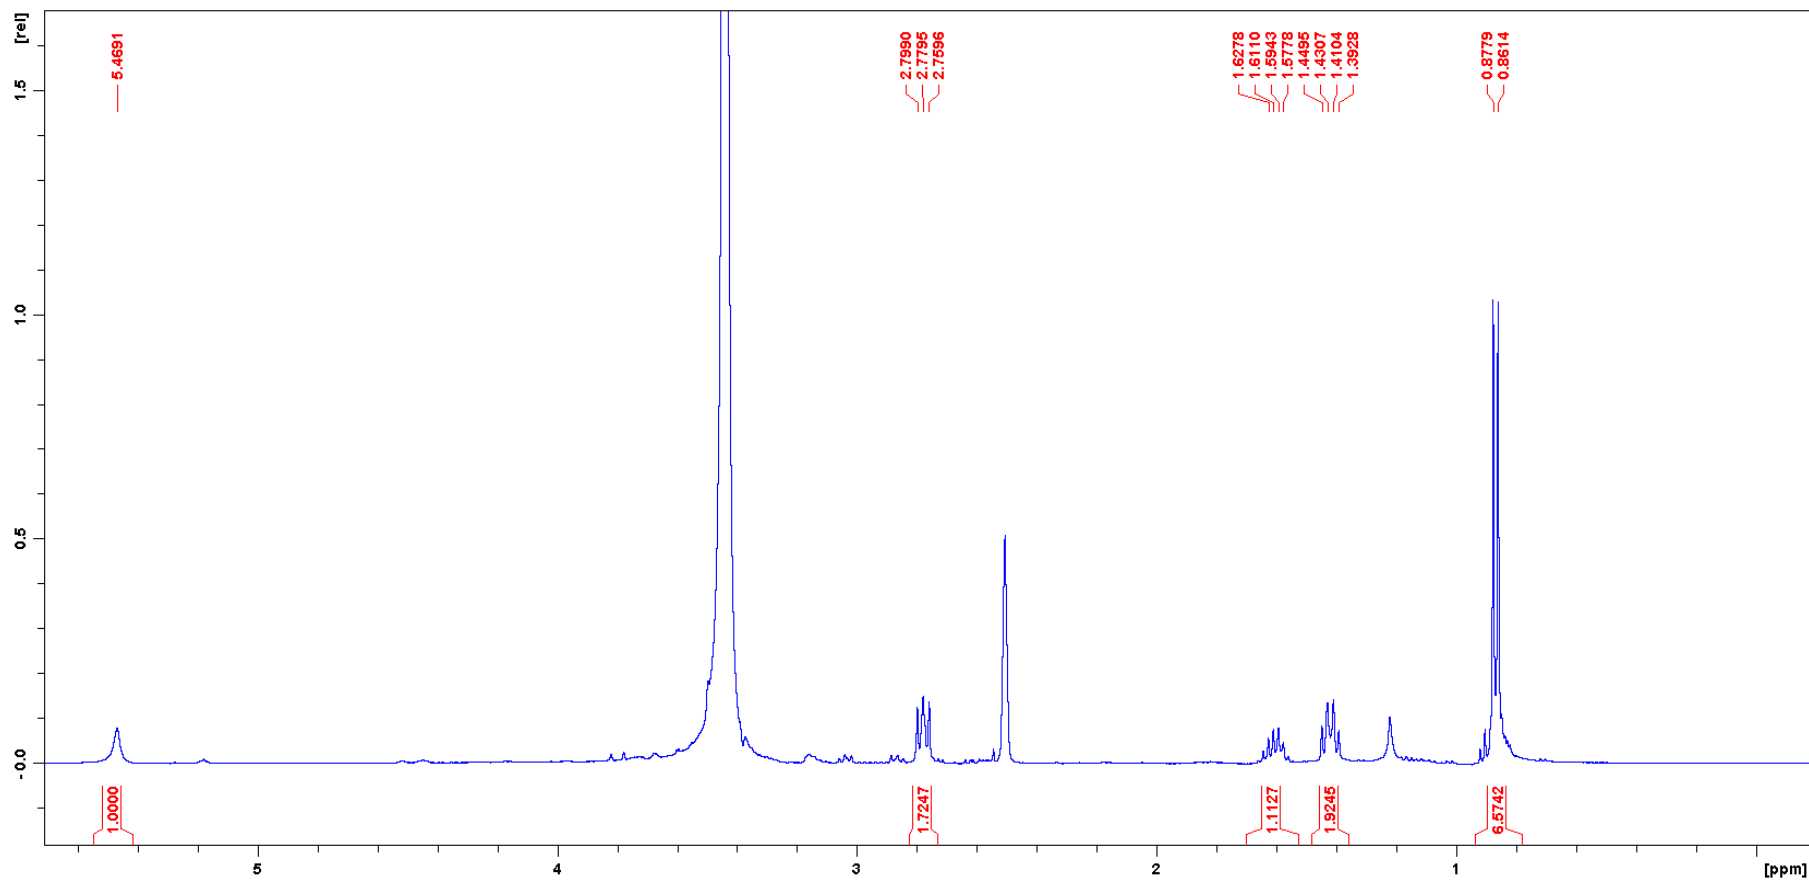

**Figure S27.**  $^{13}\text{C}$  NMR spectrum (DMSO- $d_6$ ) of 3-methylbutyl hydrodisulfide (**4**)

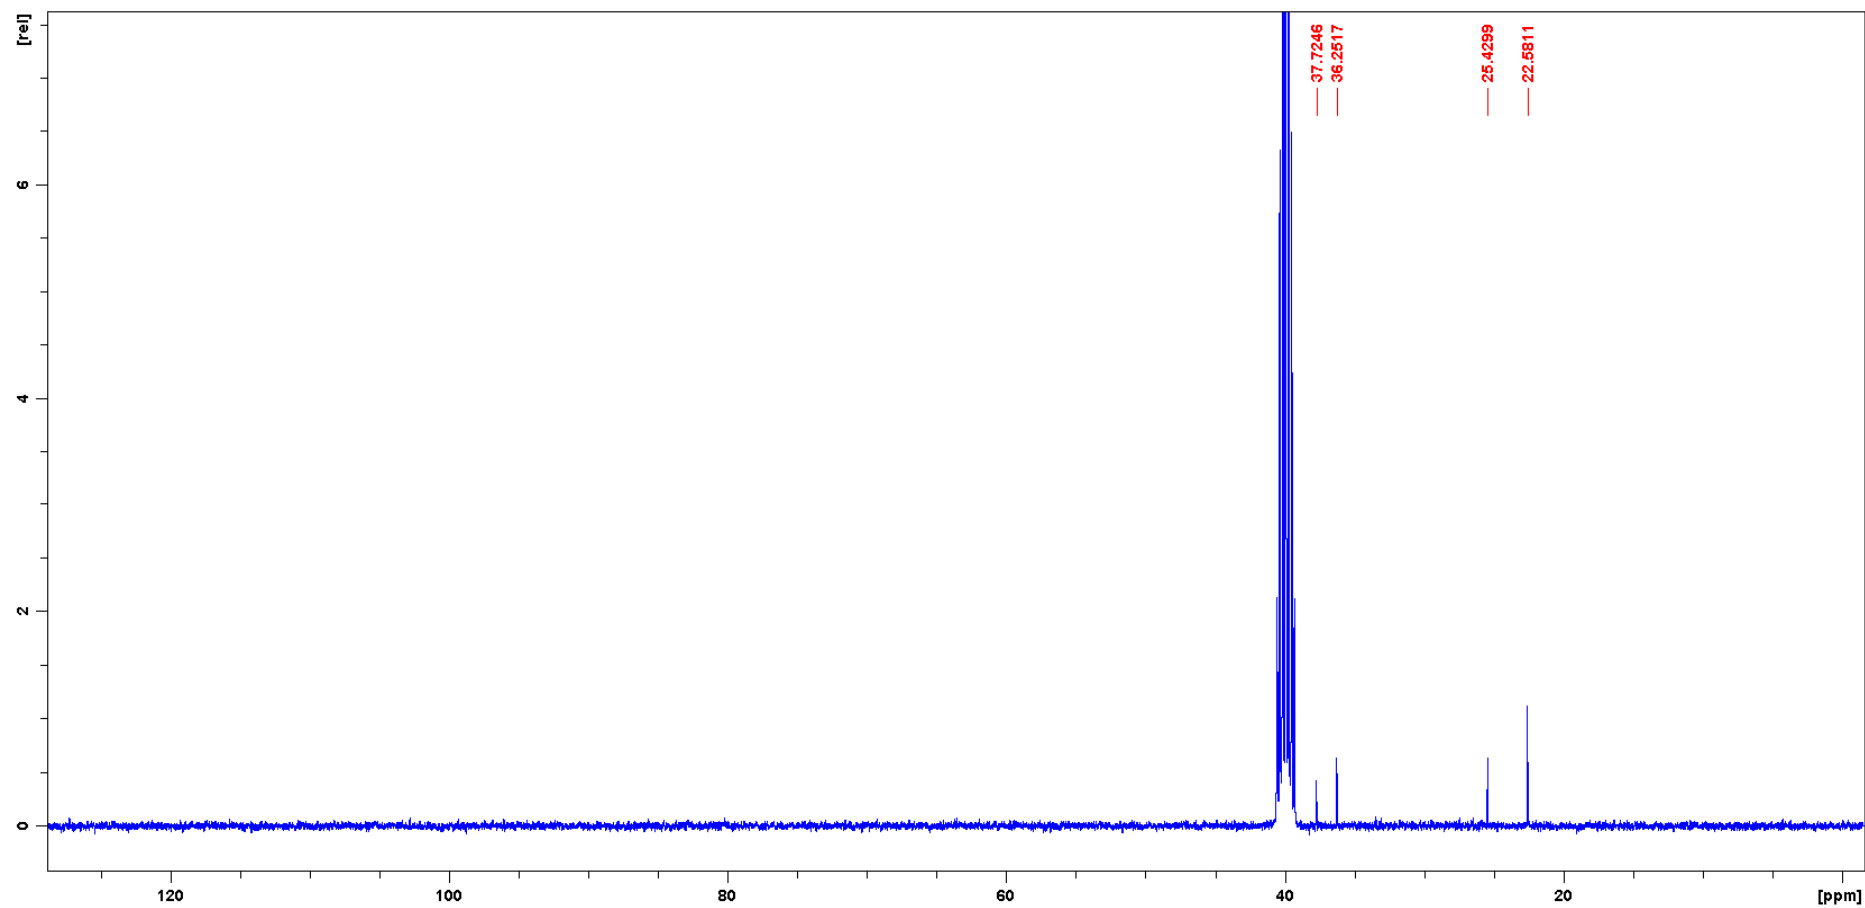

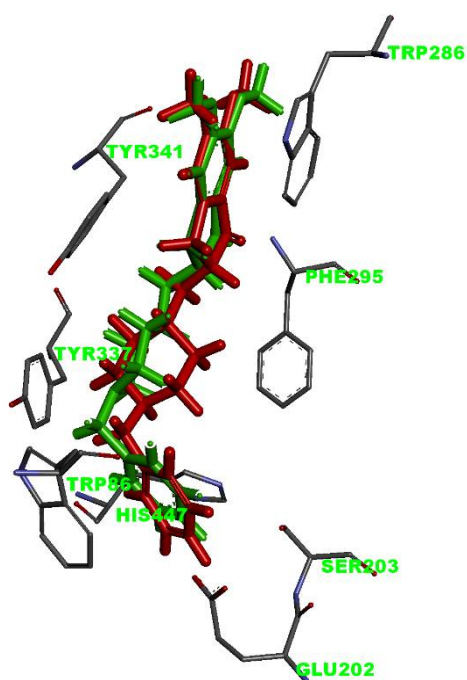

**Fig. S28.** Docking validation. Redocked donepezil (best-ranked docking solution) is reported in red sticks into the active site of AChE. Crystallographic donepezil is represented as green sticks.

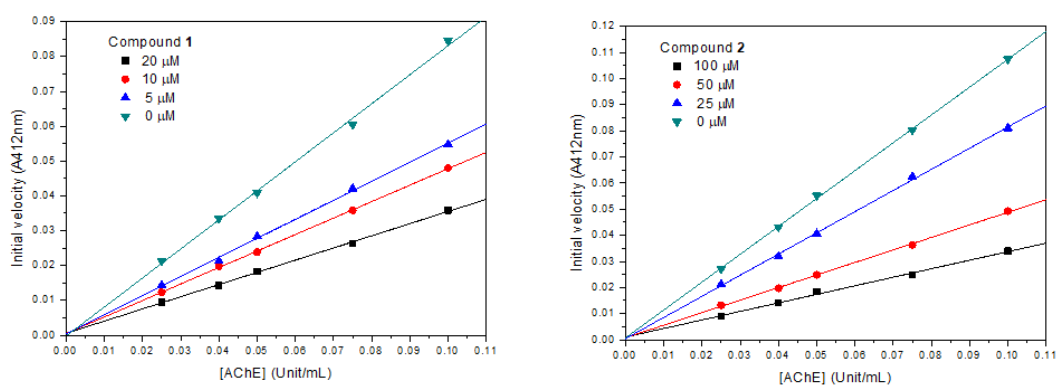

**Fig. S29.** Plots of initial velocity versus enzyme concentration for the inhibition of compounds **1** and **2** on the hydrolysis activity of AChE.
